# Supplementary material for: Comparison of IAGOS in-situ water vapour measurements and ECMWF ERA-Interim Reanalysis data
Source: Copernicus journal article supplement (doi:10.5194/acp-2019-573), 2019-07-19
Supplement: Supplementary file [file acp-2019-573-AC1-supplement.pdf]

---

## Reply to Reviewer

---

We thank both referees for their insightful reviews and helpful and constructive comments.

We agree that more scientific significance should be added to the manuscript. Therefore, we extended the chapter about pathlengths of ice supersaturated regions to include new findings and characteristics of pathlengths and distances between ISSRs.

The structure of the manuscript was therefore changed. Now, Section 3 focuses on the validation of basics variables of ERA with IAGOS measurements. Section 4 deals with the horizontal scales of ice supersaturated regions. We compare the statistics of pathlengths not only to ERA but also to higher resolution measurement data. The seasonal cycle and height dependence are also investigated.

We also made clear, that this manuscript is part of a joint investigation of water vapour in the UTLS region. A companion study by Petzold et al. (2019, in review) is focussing on the physical interpretation of the water vapour distribution in the UTLS region. Beside the investigation of the seasonal cycle of RHi and ISSRs, they study the correlation between NAO and ISSR occurrence and trend analyses.

Also, some minor errors in the analysis tools were found and corrected. First, to be consistent with other studies, an ISSR is now omitted from the statistics, as soon as the pressure level of the airplane is changed by more than 50 Pa. Additionally, a typo in the geographical mask was found and corrected. Instead of -65.E to 5.0E the algorithm used -65.0E to 0.5E. Also, the time frame of the used data is shortened to 2000 to 2009 due to a very low number of flights in 2010. In combination, the total number of ISSRs is reduced compared to the first version. Also the mean and median values slightly changed. However, the conclusions are not affected by this.

In the following, we answer to the comments point by point. *Questions and remarks of the reviewers are marked in orange*, reply of the authors are marked in black and *changes to the manuscript are marked in blue*.

At the end of this document the final version of the revised manuscript can be found. Here, red marks deleted parts of the previous version and blue indicates new parts.

---

---

## Reviewer #1

---

**Reviewer:** *I would use a more applicable title such as: Validation of ECMWF ERA-Interim Reanalysis with IAGOS in-situ water vapour measurements in the UTLS region.*

**Authors:** We agree to use a more applicable title. Since we extended also the sections including pathlengths of ice supersaturated regions, we choose following title: *Ice supersaturated regions: properties and validation of ERA-Interim Reanalysis with IAGOS in-situ water vapour measurements*

**Reviewer:** *How many data points does your comparison involve (and how many in each level)? Instead of the PDFs in Fig. 1 you could plot the total number of measurements per gridbox.*

**Authors:** We replaced Fig. 1 and are now using a map with the total number of measurements. The area of interest is divided into 35 x 35 gridboxes for this visualization. The previous version of Fig. 1 is also available in the publication by Petzold et al. (2019, in review)

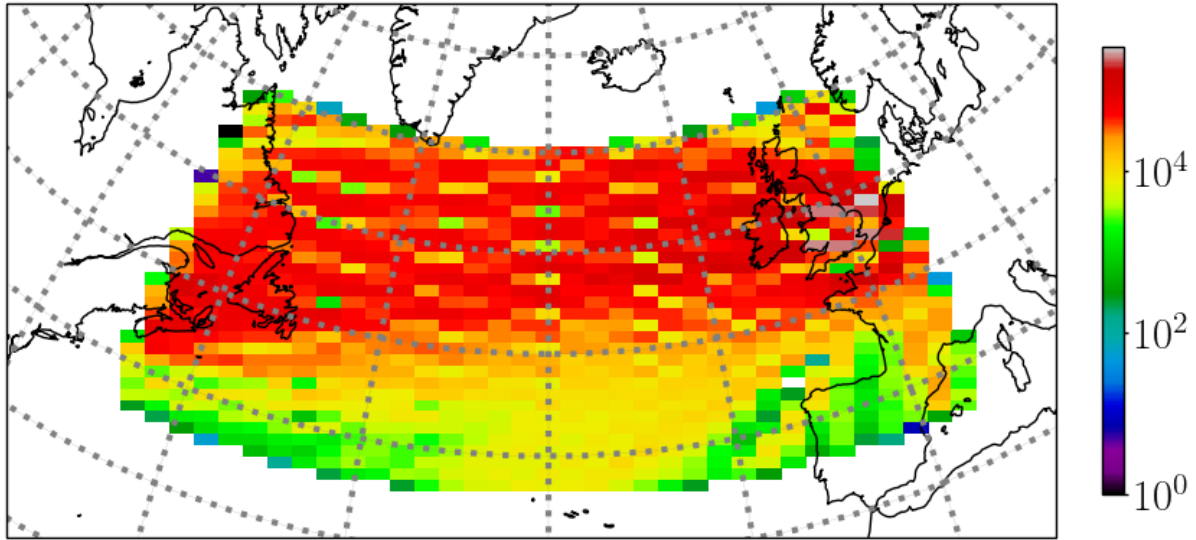

Figure 1: Number of IAGOS measurements per gridbox ( $2^\circ$  in longitudinal and  $0.57^\circ$  in latitudinal direction) during January 1st, 2000 to December 31st, 2009.

We also added the information of the number of measurements in each level in Table 1:

| Region                 | Shortname | $p_{ap} - p_{tph}$ [hPa] | number of measurements |
|------------------------|-----------|--------------------------|------------------------|
| Lowermost stratosphere | LS3       | -90                      | 3 203 483              |
|                        | LS2       | -60                      | 4 237 245              |
|                        | LS 1      | -30                      | 5 268 138              |
| Tropopause layer       | TL        | 0                        | 5 643 057              |
| Uppermost troposphere  | UT1       | +30                      | 4 649 883              |
|                        | UT2       | +60                      | 2 647 935              |
|                        | UT3       | +90                      | 909 120                |

**Table 1.** The data set is distributed into three main layers: the upper troposphere, tropopause layer, and lowermost stratosphere. The outer layers are additionally subdivided into three sublayers. The distribution criterion is the pressure difference between aircraft pressure  $p_{ac}$  and the tropopause pressure  $p_{tph}$  with the range of  $\pm 15$ hPa. Additionally, for every flight layer the number of IAGOS measurements between 2000 and 2009 are presented.

**Reviewer:** *I don't see much added value of showing PDFs and box plots of the same data especially because they are not interpreted in detail each. I would prefer the box plots in the paper and to just mention the shape of the PDFs where required. Showing the two data sets in one box plot side by side would make the comparison easier*

**Authors:** We omit Fig. 2 and Fig. 4 (PDFs of temperature and water vapour, respectively) in order to streamline the validation. Additionally, we redesigned Fig. 3, Fig. 5. and Fig. 6. to have the box plots side by side

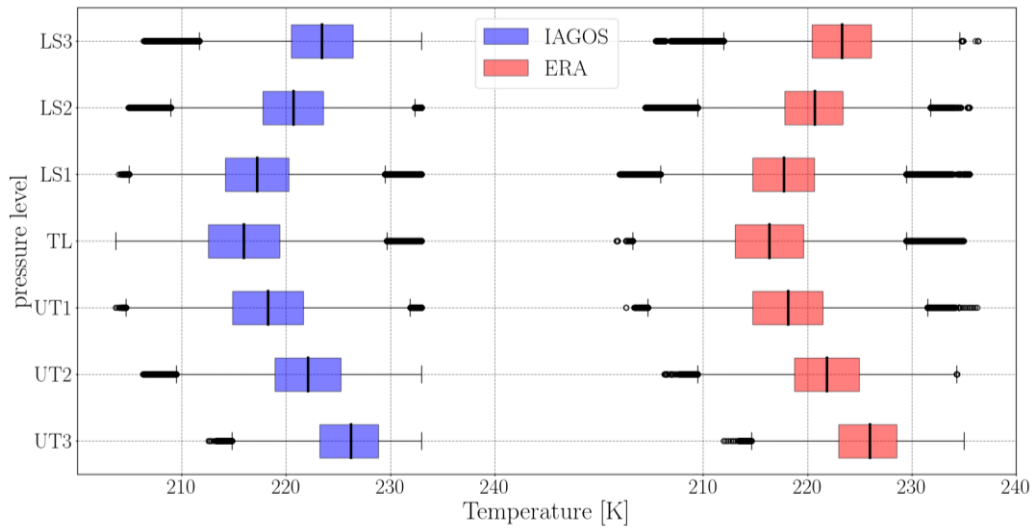

Figure 2: Vertical distribution of temperature for IAGOS (left) and ERA (right). Improved design.

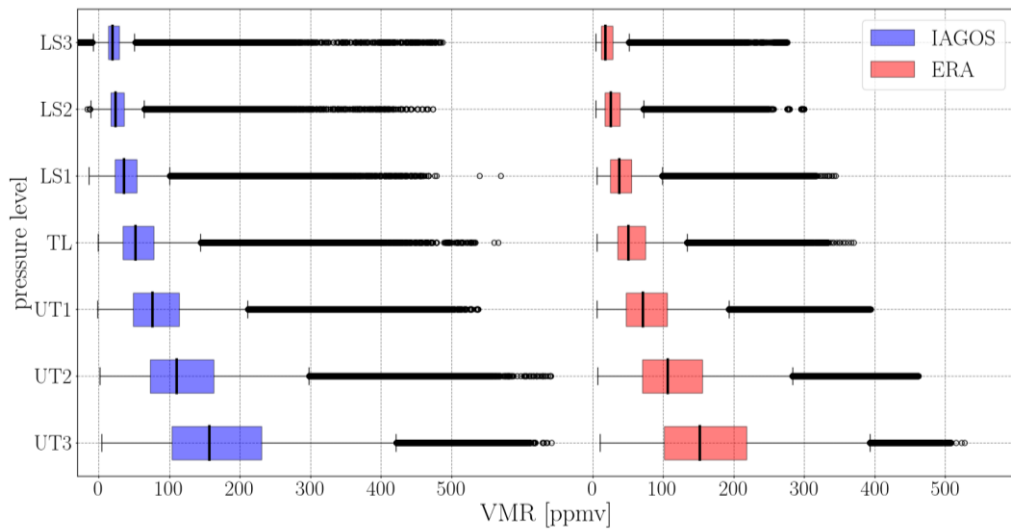

Figure 3: Vertical distribution of water vapour volume mixing ratio (VMR) for IAGOS (left) and ERA (right). Improved design.

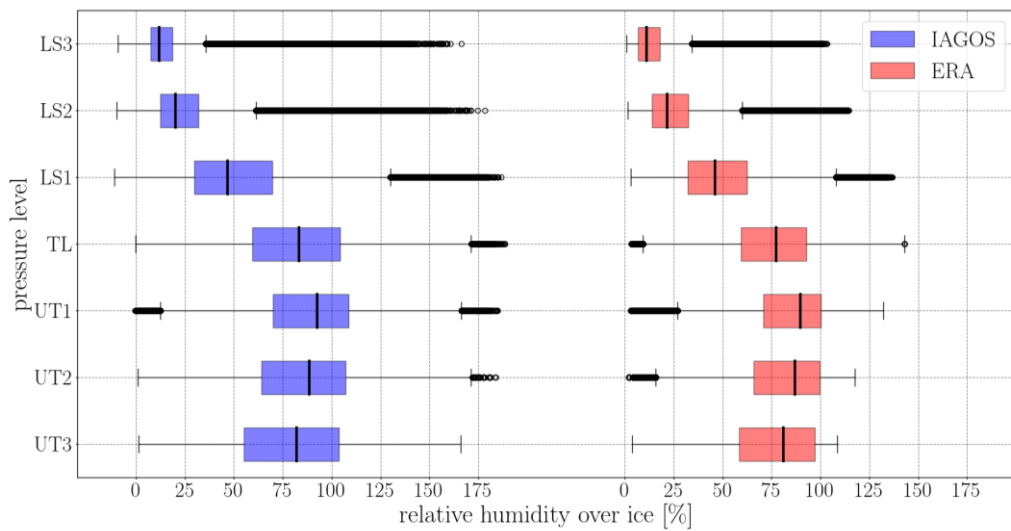

Figure 4: Vertical distribution of relative humidity over ice for IAGOS (left) and ERA (right). Improved design.

**Reviewer:** Fig. 2: Could be the non-Gaussian distribution of temperature values in UT3 be a result of the used tropopause definition?

and

**Reviewer:** The wave-like structure in Fig. 2 (mentioned on p. 7 l. 3) would be worth investigating to increase the scientific statement of the paper, especially because it is not only visible in UT3, but continues to UT2 and UT1. You could analyse the data of the discrete steps or waves, separately and explore their properties (see scientific suggestions above).

**Authors:** Here we present also the results of the temperature probability function in dependence of the tropopause definition.

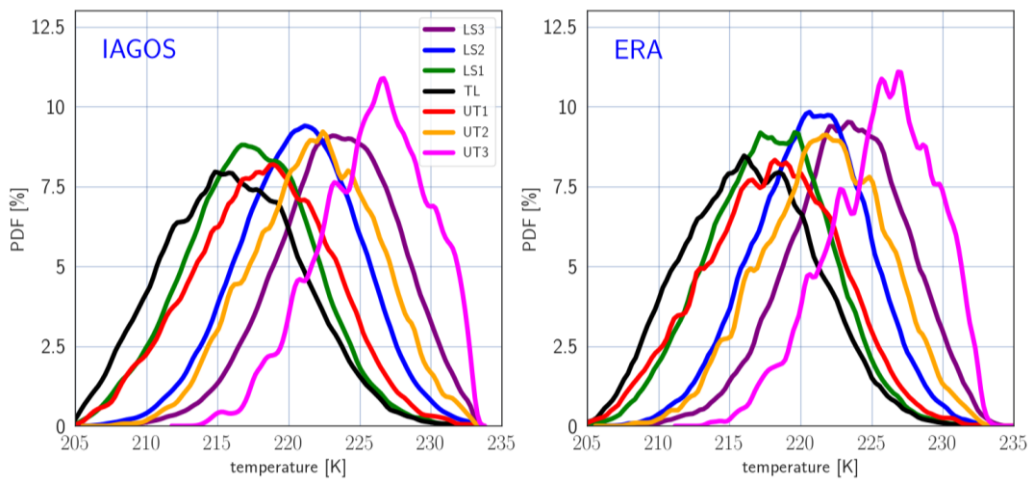

Figure 5: Probability density function of temperature for different heights (coloured) for IAGOS (left) and ERA (right) for the **dynamical** tropopause definition.

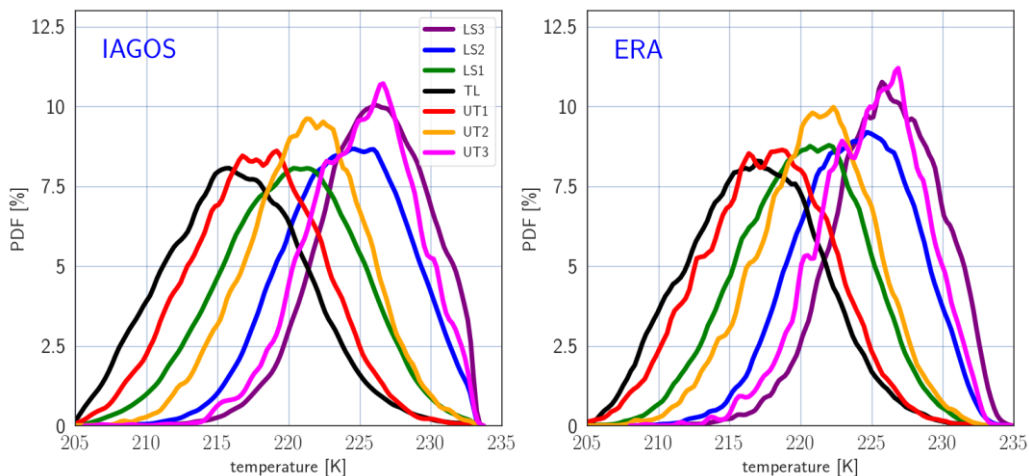

Figure 6: Probability density function of temperature for different heights (coloured) for IAGOS (left) and ERA (right) for the **thermal** tropopause definition.

We focus in the revised version of the manuscript more on the pathlengths of ice supersaturated regions. Therefore, we omit the display of probability functions (PDF) of temperature and mixing ratio (Fig.2 and 4, respectively).

Nevertheless, we want to give a short reply on your question about the influence of the tropopause definition on the behaviour of the PDFs. Figure 5 shows the vertical distribution of temperature for IAGOS and ERA using the dynamical tropopause definition. Here, the lowest layer UT3 (pink line) shows a strong non-Gaussian distribution. In Fig. 6 the thermal tropopause definition after WMO (1957) is used. Here, the lowest level shows a clearly smoother behaviour. However, this effect is stronger for the IAGOS measurements than for ERA.

The difference in the vertical structure due to the tropopause definition is also visible for the stratospheric layers which are shifted to significantly warmer temperatures (green, blue and brown lines). This is because the thermal tropopause is usually higher than the tropopause using the dynamical definition.

However, we do not unravel this feature in more detail in this manuscript, since we focus here on water vapour and ice supersaturation. But we keep this feature in mind for future studies. We also extended the manuscript regarding the pathlengths of ISSR to increase the scientific significance of this investigation.

**Reviewer:** *Dyroff et al. 2015 found a moist bias in ECMWF analyses and forecasts in the lower stratosphere. Please discuss why this bias is not apparent in your data.*

**Authors:** The IAGOS Capacitive Hygrometer (ICH) uses a capacitive sensor (HUMICAP® of type H, Vaisala, Finland). CARIBIC measure H<sub>2</sub>O with a combination of a frost point hygrometer and a photo-acoustic hygrometer, which can detect volume mixing ratios in the stratosphere below 5-10 ppmv with a better precision and uncertainty than ICH. Therefore, the uncertainties in volume mixing ratios of H<sub>2</sub>O are getting relatively large and may explain the more wet stratospheric values compared to CARIBIC.

Based on pre-and post-flight calibrations, the ICH reports RH data with an uncertainty of 4% RH in the middle troposphere and 6% RH at the tropopause (Smit et al., 2014). Applying the 2-sigma criterion (95% confidence level), the ICH limit of detection (LOD) is  $RH_{ice,LOD} = 12\%$  which transfers in a minimum detectable H<sub>2</sub>O VMR of approx. 10 ppmv at typical mid-latitude upper troposphere conditions ( $T = 218K$ ,  $p = 250$  hPa).

This is in agreement with in-flight intercomparisons against high-precision water vapour instruments in dedicated research aircraft studies (Helten et al., 1999; Neis et al., 2015a; Neis et al., 2015b). More detailed information on the instrumentation of IAGOS is also available in the accompanying manuscript by Petzold et al. (2019, in review)

We include following text to the manuscript:

*Dyroff et al. (2015) reported a moist bias comparing CARIBIC measurements with ECMWF analyses and forecasts. Since ERA-Interim is based on ECMWF analyses one would expect also a moist bias in the lower stratosphere. In contrast to the capacitive sensor used for IAGOS, CARIBIC uses a combination of a frost point hygrometer and a photo-acoustic hygrometer, which shows a better precision and uncertainty for very low water vapour volume mixing ratios. Therefore, the uncertainties in volume mixing ratios of H<sub>2</sub>O are large in the lower stratosphere and may explain the more wet stratospheric values compared to CARIBIC.*

Finally, the distribution of water volume mixing ratio for IAGOS and ERA is seen in the following figure, where a slight shift to larger values is visible in the two uppermost layers (LS2 and LS3) for ERA.

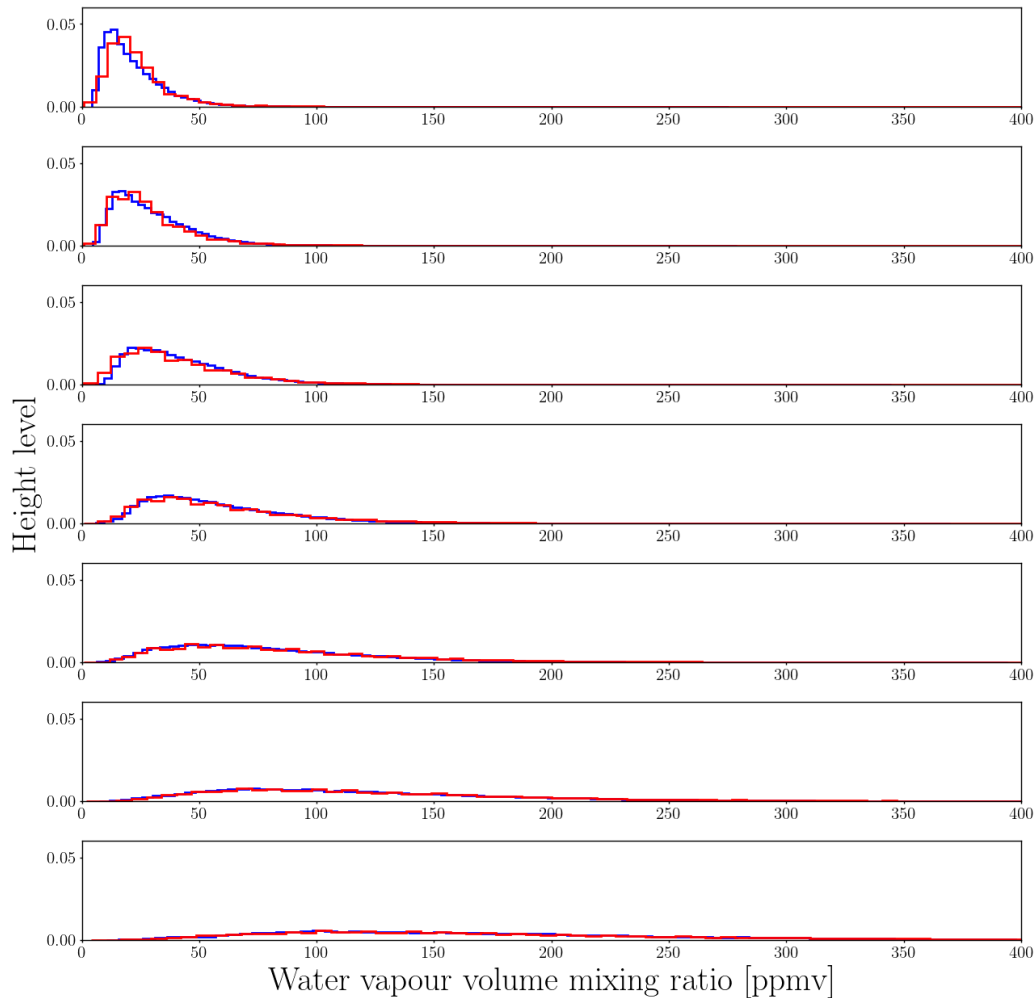

Figure 7: Histogram of water vapour mixing ratio for all levels (from LS3 at the top to UT3 at the bottom) for IAGOS (blue) and ERA (red). For the layers LS2 and LS3 the maximum of ERA shifted to higher mixing ratios.

**Reviewer:** *P. 11 l. 7: The sentence is a bit weird: Do you call ERA-Interim a climate model or do you draw from your results that climate models must show an underestimation of ISSRs as well? Please reconsider/reformulate*

**Authors:** Yes, this sentence is not well written. We wanted to express a general implication of the underestimated abundance of ISSRs. We reformulated it to:

*“Since ISSRs in the lower stratosphere are an important factor for the lifetime of contrail cirrus, a good model representation of the abundance of ice supersaturation in this region is important for an adequate description of the Earth’s radiative budget.”*

**Reviewer:** *Do the negative RHI for IAGOS in the LS in Fig. 6 make sense?*

**Authors:** Before the implementation into the aircraft each sensor is calibrated. For a new calibrated sensor in laboratory conditions the offset is zero. This offset is changing over time by deposition of dirt on the sensor, which leads to a mostly negative offset. Although this drift is corrected, due to the measuring inaccuracy values down to -5% for the relative humidity with respect to water are possible. This converts to -15% for  $RH_i$  at the most.

More information on data processing can be found in Petzold et al. (2019, in review).

**Reviewer:** *How does your statistics of temperature and mixing ratio (Fig. 3, 5) appear inside (and outside) of the ISSRs? Is there a way to relate the underestimation of  $RH_i > 100\%$  in ERA to either of these variables?*

**Authors:** We add here the vertical profiles for temperature (Fig. 8) and water volume mixing ratio (Fig. 9) for cases, where both IAGOS and ERA show ice supersaturation at the same time.

For the highest level LS3 no overlapping ISSRs occur. In layer LS2 ERA shows colder temperatures, but Figure 9 also reveals dryer conditions for ERA compared to IAGOS. Both features (colder and dryer) are compensating each other.

In the layers beneath no significant deviations between IAGOS and ERA are visible. The reason for this might be that only data points were used, where both IAGOS and ERA show supersaturation. This is most likely the case within an ice supersaturated region, where both data sets agree well.

Apparently, the differences appear, where both datasets are not overlapping, for instance at the edge of ISSRs. Figure 8 of the revised manuscript shows the exemplary flight from Atlanta (USA) to Frankfurt (Germany), where ERA shows a good agreement with IAGOS as far as the large-scale variability is concerned. However, the positions of the ISSR in that case are shifted in ERA, especially for the second ISSR around a flown distance of 6000 km. Therefore, the agreement between IAGOS and ERA is quite good when both data sets have an ISSR at the same position.

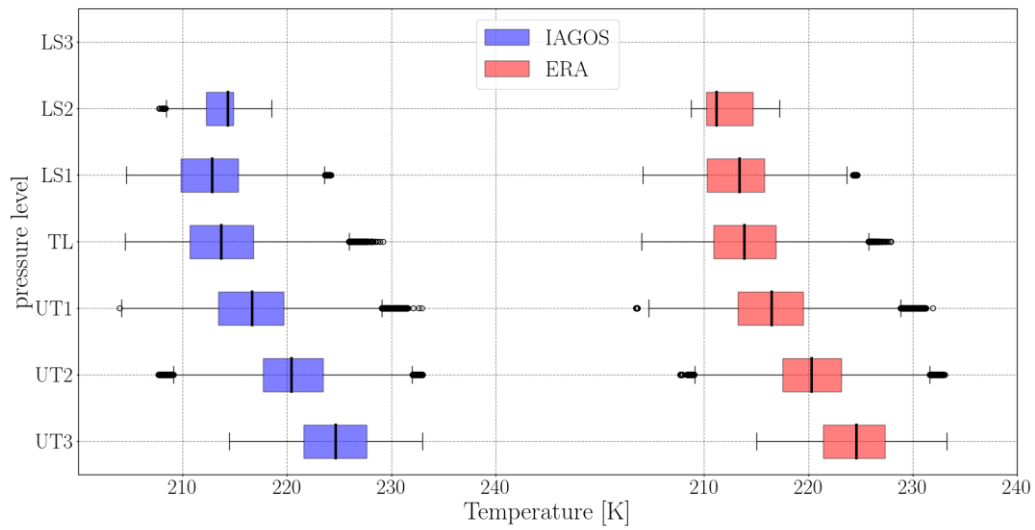

Figure 8: Vertical profile of temperature for IAGOS (blue) and ERA (red) for cases, where both IAGOS and ERA show ice supersaturation.

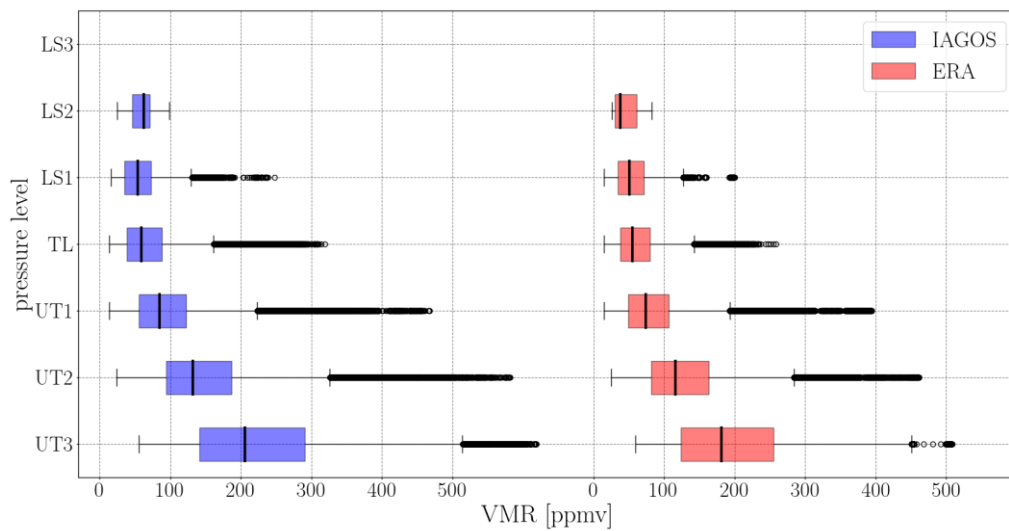

Figure 9: Vertical profile of water vapour volume mixing ratio for IAGOS (blue) and ERA (red) for cases, where both IAGOS and ERA show ice supersaturation.

**Reviewer:** P. 12 l. 6ff and Fig. 8: Does your ISSR fraction mean the (relative) number of ISSRs among all data points? Please clarify.

**Authors:** The ISSR fraction is defined as the number of data points with  $RH_i \geq 100\%$  within a layer divided by the number of all data points in that layer. We added following sentence:



*“The ISSR fraction in this study is defined as the number of data points within a layer with RHi  $\geq$  100% divided by the total number of data points in that layer above the defined North Atlantic region.”*

**Reviewer:** *subsection 3.4.1: What are the flight distances of your examples? It would prefer a length axis instead of or in addition to time in Fig. 9*

**Authors:** We have changed this part and present only one exemplary flight. We use the flown distance as x-axis.

**Reviewer:** *subsection 3.4.1: To add some scientific content it would be very interesting to discuss the weather situation behind the flights, e.g. with a satellite image.*

**Authors:** We have added a discussion of the weather situation for the specific flight.

**Reviewer:** *As far as I understood the first paragraph of 3.4.2 refers to the comparison of IAGOS (1km) and ERA in Fig. 10? If so, it would help to draw the reader's attention to the respective lines in the figures e.g. (see black and red lines in Fig. 10).*

**Authors:** We have added this to the text.

**Reviewer:** *P. 14 l. 8: "Already with a resolution of 1km the cumulative distribution exhibits a different character." Different to what? Or do you mean "10km" instead of "1km"?*

**Authors:** Yes, this was a typo. We reformulated this passage to:

*“Already with a resolution of 2 km the number of small ISSRs is decreasing strongly. The median value increases to 7 km, compared to the original resolution. Decreasing the spatial resolution further leads to a decrease in the number of found ISSRs and an increase of the mean and median ISSR pathlength. At a resolution of 10 km the cumulative distribution exhibits a different character compared to the original data.”*

**Reviewer:** *P. 15 l. 1: What exactly do you mean by: "...the behaviour of the ERA data set changes for pathlengths of 100km..."? Please revise*

**Authors:** We wanted to point out that the course of the cumulative distribution for ERA is different for pathlengths smaller than 100 km compared to the 100 km running mean of IAGOS. We reformulated this part to:

*“When comparing the results of the 100km running mean of IAGOS with the ERA data set it is also noteworthy that the behaviour for ERA is clearly different for pathlengths smaller than 100 km. ERA shows a significantly higher probability for very small ISSRs (< 10 km) than the running mean with 100 km. However, the increase in probability to pathlengths of up to 100 km is flatter in ERA.”*

**Reviewer:** *P. 16 l. 8-11: This is part of the motivation and should appear much earlier, in the introduction*

**Authors:** Yes, we moved this part to the introduction.

*Additional comments:*

*1. P. 1 l. 23: Remove the "s" from clouds*

We corrected this.

*2. P. 2 l. 25: hydroxyl?*

We corrected this.

*3. P. 9 l. 14: "that IAGOS data set shows": add "the" before IAGOS or remove "set"*

This part was rewritten.

*4. P. 11 l. 11:  $R_{Hi} > 1$ : Do you mean  $R_{Hi} > 100\%$ ?*

We mean 100%. We corrected this.

*5. P. 12 l. 9: Remove double "the"*

We corrected this.

*6. P. 12 l. 14: Correct "reanalysis"*

This part was rewritten.

*7. P. 14 l. 10: Delete one "s" in "median values increases"*

This part was rewritten.

*8. P. 15 l. 5. Lower case "s" in ISSRS*

We corrected this.

*9. P. 15 l. 26: I would change "Moving up to the stratospheric layers, as expected, the  $R_{Hi}$  values are" to "...layers the  $R_{Hi}$  values, as expected, are*

We corrected this.

---

## Reply to Reviewer #2

---

**Reviewer:** *The study shows the good ability of IAGOS measurements to capture small scale ISSRs (smaller than 100 km) and at the same time gives credit to the ERA-Interim model to depict large scale ISSRs (larger than 100km). These are important findings which merit publication as far as our knowledge on the detection of ISSRs from different datasets. However, presenting only pdfs and boxplots in a comparison study is not sufficient to justify publication in a journal as such ACP. The authors should make deeper comparisons with their ISS data. For instance:*

*1) They could perform simple time series analysis for their region (40-60N, 5-65W) and plot the monthly time series of the two ISS datasets from 2000 to 2010, compare the seasonal cycles, and then correlate the two time series after removing the seasonal variability.*

**Authors:** We thank the reviewer for the constructive suggestion.

We decided to increase the scientific value by investigating the pathlengths of ice supersaturated regions. Additionally, we added a comparison of the timeseries of the fraction of ISSR for the upper troposphere, tropopause region and lower stratosphere. Since in the accompanying study by Petzold et al. (2019, in review) (de-seasonalized) time series of ISSRs are shown, we focus on the comparison between IAGOS and ERA. We show that ERA can reproduce the ISSR fraction if a lower threshold than  $RH_i=100\%$  is used. In the lower stratosphere the best agreement between IAGOS and ERA is found, when ice supersaturation in ERA is defined as  $RH_i \geq 85\%$ . In the tropopause this threshold increases to  $RH_i \geq 90\%$  and in the upper troposphere to  $RH_i \geq 95\%$  (dashed red lines in Fig. 10).

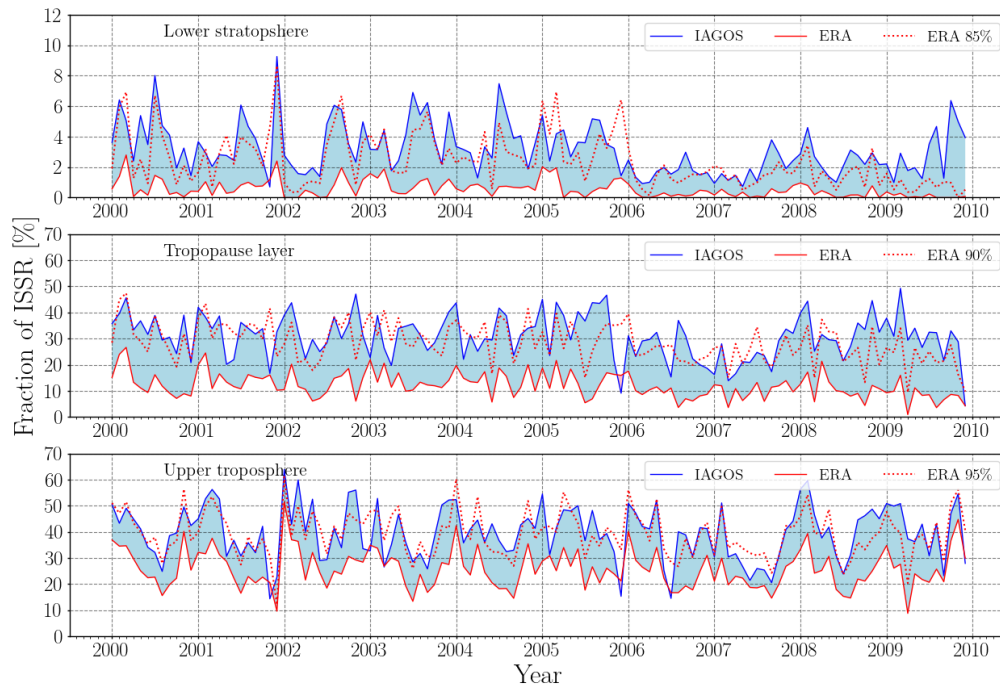

Figure 10: Time series of monthly fraction of ice supersaturated regions for IAGOS (blue) and ERA (red) for the lower stratosphere (LS3 to LS1), the tropopause layer (TL), and the upper troposphere (UT1-UT3). The dashed red line represents the ERA data set with the fraction of  $RH_i \geq 85\%$  for the lower stratosphere,  $RH_i \geq 90\%$  for the tropopause layer and  $RH_i \geq 95\%$  for the upper troposphere. Note the different scale for the lower stratosphere.

**Reviewer: 2)** *It has been shown that cirrus cloud variability is significantly affected by the North Atlantic Oscillation during winter (Eleftheratos et al., 2007). The authors could test if a correlation between the deseasonalized ISS data and the NAO index exists.*

**Authors:** The accompanying publication by Petzold et al. (2019, in review) investigates the correlation between the NAO-Index and the IAGOS data. The authors conclude that there is a statistically significant correlation for the North Atlantic and Europe.

We have made it clearer in the manuscript that our study is part of a joint investigation of water vapour in the upper troposphere to the lower stratosphere and added the following part to the introduction:

*“This study is part of a joint investigation of water vapour in the upper troposphere to the lower stratosphere. A companion study by Petzold et al (2019) will focus on the physical interpretation of the water vapour distribution in the UTLS region. There, a detailed investigation of the seasonal cycle of  $RH_i$  and ISSRs, the physio-chemical signature of ISSR, the ISSR fraction and cirrus cloud occurrence is presented. Additionally, they also present a trend analysis.”*

#### Technical corrections

P3 I16: correct 'asses' to 'assess'.

We corrected this.

*P3 I26: correct 'continous' to 'continuous', correct 'greenhous' to 'greenhouse'.*

We corrected this.

*P4 I2: you say '40N-60N, 5-65W' but on p5 I16 you write 'from 40o to 60o North and -65o to 5o East'. Please write the correct coordinates for longitude.*

We corrected this and write now (40N to 60N, -65E to 5E)

*P4 I15: what is the '4s resolution'?*

We mean the temporal resolution of the data. We clarified this in the text.

*P8 table 3: for the case of TL, the mean VMR are 61 (IAGOS) and 31 (ERA). Is the value for ERA correct?*

This is a typo. The correct value is 58 ppmv for ERA.

*P9 I15: where do you compare 'the seasonal cycle'?*

We deleted this fragment of an earlier manuscript version.

*P9 I16: there is larger variability in the in-situ data. Why do you say 'smaller variability'?*

We reformulated it to: *"In summary, the reanalysis data is in good agreement with the vertical distribution of the IAGOS data. However, IAGOS shows a larger variability and stronger extreme values."*

*P12 I6: correct 'profil' with 'profile'.*

This part was rewritten.

*P14 I13: correct 'similiar' with 'similar'.*

This part was rewritten.

#### References:

WMO (World Meteorological Organization): Meteorology – A three-dimensional science: Second Session of the Commission for Aerology, WMO Bull. IV(4), WMO, Geneva, 134–138, 1957.

Petzold, A., Neis, P., Rütimann, M., Rohs, S., Berkes, F., Smit, H. G. J., Krämer, M., Spelten, N., Spichtinger, P., Nedelec, P., and Wahner, A.: Ice-supersaturated air masses in the northern mid-latitudes from regular in-situ observations by passenger aircraft: vertical distribution, seasonality and tropospheric fingerprint, Atmos. Chem. Phys. Discuss., <https://doi.org/10.5194/acp-2019-735>, in review, 2019.

# **Comparison of ERA-Interim Reanalysis with IAGOS in-situ water vapour measurements and ECMWF ERA-Interim Reanalysis data**

Philipp Reutter<sup>1</sup>, Patrick Neis<sup>1,2,\*</sup>, Susanne Rohs<sup>2</sup>, and Bastien Sauvage<sup>3</sup>

<sup>1</sup>Institute for Atmospheric Physics, Johannes Gutenberg University Mainz, Mainz, Germany

<sup>2</sup>Institute of Energy and Climate Research Troposphere (IEK-8), Forschungszentrum Jülich, Jülich, Germany

<sup>3</sup>Laboratoire d'Aerologie, Université de Toulouse, CNRS, UPS, Toulouse, France

\* now at: CGI Deutschland [B. V. CO. KG, Frankfurt, Germany](#)

**Correspondence:** Philipp Reutter (preutter@uni-mainz.de)

**Abstract.** Cirrus clouds and their potential formation regions, so-called ice-supersaturated regions (ISSRs) [with values of relative humidity with respect to ice exceeding 100%](#) occur frequently in the tropopause region. It is assumed that ISSRs and cirrus clouds can change the tropopause structure by diabatic processes, driven by latent heating due to phase transition and interaction with radiation. For many research questions a three-dimensional picture including a sufficient temporal resolution of the water vapour fields in the tropopause region is required. This requirement is fulfilled nowadays by reanalysis products such as the European Centre for Medium-Range Weather Forecasts (ECMWF) ERA-Interim reanalysis. However, for a meaningful investigation of water vapour in the tropopause region a comparison of the reanalysis data with measurement is advisable, since it is difficult to measure water vapour and to assimilate meaningful measurements into reanalysis products. Here, we present an intercomparison of high-resolution in-situ measurements aboard passenger aircraft within the European Research Infrastructure IAGOS (In-service Aircraft for a Global Observing System; <http://www.iagos.org>) with ERA-Interim. Temperature and humidity data over the North Atlantic from 2000 to ~~2010~~[2009](#) are compared relative to the dynamical tropopause. The comparison of the temperature shows a good agreement between measurement and ERA-Interim. While ERA-Interim also shows the main features of the water vapour measurements of IAGOS, the variability of the data is clearly smaller in the reanalysis data set. The combination of temperature and water vapour leads to the relative humidity with respect to ice ( $RH_i$ ). Here ERA-Interim deviates from the measurements concerning values of larger than  $RH_i = 100\%$ , both in number and strength of supersaturation. [Also pathlengths of ISSRs along flight tracks are investigated, representing macrophysical properties as linked to atmospheric flows.](#) The comparison of ISSR pathlengths shows distinct differences, which can be traced back to the spatial resolution of both data sets. [Also, the seasonal cycle and height dependence of pathlengths changes for the different data sets due to their spatial resolution.](#) IAGOS shows significantly more smaller ISSRs compared to ERA-Interim. A good agreement begins only at pathlengths in the order of the ERA-Interim spatial resolution and larger.

## 1 Introduction

Water vapour is the most important greenhouse gas in the atmosphere and therefore plays a major role in the Earth's radiative balance (Myhre et al., 2013). Especially in condensed form water is also of large significance for the planetary radiation. Clouds can reflect incoming solar radiation, while absorbing and reemitting longwave radiation from the earth. Particularly the effect of cirrus clouds are still challenging. Whether a cirrus ~~clouds~~ cloud has a net warming or cooling effect on the Earth's atmosphere depends strongly on altitude, available humidity and microphysical properties like number, size and type of ice nuclei (IN). Even the same exact cirrus cloud can change the sign of its net forcing depending on the time of day (Joos et al., 2014).

The control parameter for cold cloud formation in the upper troposphere is relative humidity with respect to ice, which reaches supersaturation by exceeding the temperature dependent water-holding capacity of the air mass (Gierens and Spichtinger, 2000; Spichtinger et al., 2003b).

$$RH_i = 100 \cdot \frac{p_v}{p_{si}(T)} \quad (1)$$

where  $p_v$  is the present water vapour partial pressure and  $p_{si}$  the water vapour saturation pressure over ice water at temperature  $T$ , respectively. The amount of ice supersaturation needed to form ice crystals depends strongly on the nucleation mechanism. Homogeneous nucleation of solution droplets requires supersaturations with respect to ice of at least 45% (Koop et al., 2000), whereas heterogeneous freezing occurs at much lower supersaturations (DeMott et al., 2003; Mohler et al., 2006).

Ice supersaturation, first hypothesized by Alfred Wegener in 1911, is commonly found in the upper troposphere (Gierens et al., 1999; Spichtinger and Leschner, 2016; Gettelman et al., 2006).

~~Therefore, the~~ These so-called ice supersaturated regions (ISSR), i. e. air masses in the status of ice supersaturation, constitute an important formation region for in-situ cirrus clouds (Krämer et al., 2016). While ISSRs alone do only have a minor effect on the local radiative budget (Fusina et al., 2007), the transformation from an ISSR to a region with cirrus clouds has a significant effect.

Although ISSRs and cirrus clouds are mostly found in the upper troposphere, they also occur above the tropopause and have an effect on the lower stratosphere (LS). Since the region of the upper troposphere and lower stratosphere, the so-called UTLS region, is characterized by the coldest and driest air (Dessler and Sherwood, 2009; Held and Soden, 2000) the outgoing long-wave radiation is most sensitive to absolute changes in the UTLS water vapour (Riese et al., 2012).

Besides the major role in the planetary radiation balance, water vapour distributions in the upper troposphere and lower stratosphere influences the UTLS chemistry. For example, stratospheric water vapour is partly a product of photochemical methane oxidation and will increase with anthropogenically increasing tropospheric methane concentrations (Rohs et al., 2006). This increase of water vapour could lead to a more frequent formation of polar stratospheric clouds causing more ozone destruction in the stratosphere (Solomon et al., 2010). The chemical impact of tropospheric water vapour is, for example, the reaction with photolyzed ozone to the ~~hydroxyl~~ hydroxyl radical OH which further reacts with hundreds of gases and also leads to the rapid formation of acids that are deposit in precipitation (Thompson, 1992).

Another important aspect of water vapour distribution in the atmosphere is its feedback on atmospheric motions and stability. Water vapour is transported quickly through the atmosphere and redistributes energy by phase changes. For example, the condensation of water vapour close to the tropopause in potentially unstable layers can trigger the so-called shallow cirrus convection by latent heat release (Spichtinger, 2014). This alters the temperature and stability close to the tropopause with further implications on the exchange of air masses between troposphere and stratosphere.

Hence, a thorough description of processes related to the water vapour distribution are of crucial importance. However, measurements of water vapour at the tropopause level are not trivial. Beside radiosonde data the most important in-situ data set is provided by in-service passenger airplanes. Since 1994, commercial passenger aircrafts are measuring water vapour in the UTLS within the framework IAGOS (In-service Aircraft for a Global Observing System, (Petzold et al., 2015)) and its predecessors MOZAIC (Measurement of Ozone and Water Vapour on Airbus in-service Aircraft, (Marengo et al., 1998)) and CARIBIC (Civil Aircraft for the Regular Investigation of the Atmosphere Based on an Instrument Container, (Brenninkmeijer et al., 2007)). These regular measurements on a global scale are unique in their quantity, continuity and quality of measurements. Using five years of the continuous measurements over the North Atlantic, Gierens et al. (1999) described the humidity distribution in this region. These results were then used to improve the cloud scheme in the European Centre for Medium-Range Weather Forecast (ECMWF) Integrated Forecast Model (IFS) including the parameterization of superaturation with respect to ice in the cloud-free part of the grid box (Tompkins et al., 2007)

Meanwhile, the IAGOS data set now spans about 20 years and also allows trend analysis, for example with regard to the temperature. Here, a difference between in-situ and modelled data arise. While IAGOS exhibits a neutral temperature trend in the LS, the reanalysis data ERA-Interim of the ECMWF shows a temperature trend of  $+0.56 \text{ K decade}^{-1}$  (Berkes et al., 2017). This underlines the importance of a thorough comparison between measurements and modelled data. To investigate the mutual influence of water vapour in the UTLS region in the future, properties regarding the water vapour such like relative humidity with respect to ice, fraction of ice supersaturated regions or pathlengths of ISSRs are compared between IAGOS measurements and ERA-Interim output.

Although the new version of reanalysis data from the ECMWF, ERA5, is already available, we conducted this study using ERA-Interim. Many studies in this decade regarding the UTLS region are based on ERA-Interim model output (e.g. Zhan and Wang (2012); Riese et al. (2012); Uma et al. (2014); Madonna et al. (2014); Reutter et al. (2015)). Also, ERA-Interim is still used in many ongoing investigations. Therefore, a comparison between measurements and ERA-Interim is still valuable.

This study is part of a joint investigation of water vapour in the upper troposphere to the lower stratosphere. A companion study by ~~Neis et al (in preparation)~~ will ~~with~~ Petzold et al. (2019) focus on the physical interpretation of the water vapour distribution in the UTLS region. There, a detailed investigation of the seasonal cycle of RH<sub>i</sub> and ISSRs, the physio-chemical signature of ISSR, the ISSR fraction and cirrus cloud occurrence is presented. Additionally, they also present a trend analysis.

The aim of ~~this work is to asses~~ our work is twofold. On the one hand, to assess the quality of the ~~desription~~ description of water vapour in the UTLS region in the ERA-Interim data set.



~~Therefore~~To have a sufficient size of data, the data ~~sets ranging set~~ includes 10 years from 2000 to ~~2010~~ are compared. 2009. On the other hand, we extend the physical investigation of Petzold et al. (2019) to characterize the horizontal scales of ISSRs as linked to atmospheric flows and also depending on the seasonal cycle and height. We also compare these results to ERA-Interim as well as to other studies.

5 Sect. 2 describes the data sets and the methodology. In Sect. 3 the comparison of IAGOS and ERA-Interim is presented ~~in different ways~~for the variables temperature, water vapour mixing ratio and relative humidity with respect to ice. Sect. 4 investigates the horizontal scales of ISSRs. The conclusion can be found in Sect. ~~4~~.

5.

## 2 Data and methodology

10 The evaluation of the reanalysis data is based on in-situ measurements. Both data sets are presented in the following.

### 2.1 IAGOS

The European Research Infrastructure 'In-service Aircraft for a Global Observing System' (IAGOS, Petzold et al. (2015)) provides long-term in-situ measurements in the UTLS region. The IAGOS-CORE component, successor of the MOZAIC part, comprises the implementation and operation of autonomous instruments installed on long-range aircraft of internationally  
15 operating airlines for ~~continous~~continuous, global-scale and daily measurements of reactive gases and long-lived ~~greenhous~~greenhouse gases (e.g. CO, CO<sub>2</sub>, CH<sub>4</sub> and water vapour), important chemically active trace gases (e.g. O<sub>3</sub>), as well as aerosol, dust and cloud particles (Bundke et al., 2015; Filges et al., 2015).

Especially in the UTLS region these measurements are very valuable as most flight tracks are situated in heights between 9 to 13 km, depending on the actual weather conditions, seasons and geographic region.

20 Starting from August 1994 more than 60000 flights (May 2019) have been performed, including data from the IAGOS predecessor MOZAIC (August 1994 to December 2014) and data from the IAGOS project starting in July 2011 until present. From Figure 1 it is obvious that the global data distribution is not uniform in every region. The subset covering the North Atlantic flight corridor shows the highest coverage of flights. Therefore, in our study we focus on this region (~~40N-60N,~~  
~~5-65W~~40N to 60N, -65E to 5E). For the evaluation of the reanalysis data we use the geographic position of the airplane  
25 (lat/lon), the time, data quality flags, ambient pressure and temperature (Berkes et al., 2017), relative humidity and water vapour volume mixing ratio. In this study we use the data collected during January 2000 to December ~~2010~~2009. For further information regarding the IAGOS project the reader is referred to the project's website [www.iagos.org](http://www.iagos.org) and the references therein.

### 2.2 ERA-Interim

30 For this study the ERA-Interim reanalysis data set from the European Centre of Medium-Range Weather Forecasts (ECMWF) is used (Dee et al., 2011). The spectral resolution of the underlying IFS model from 2006 is T255, which calculates to a

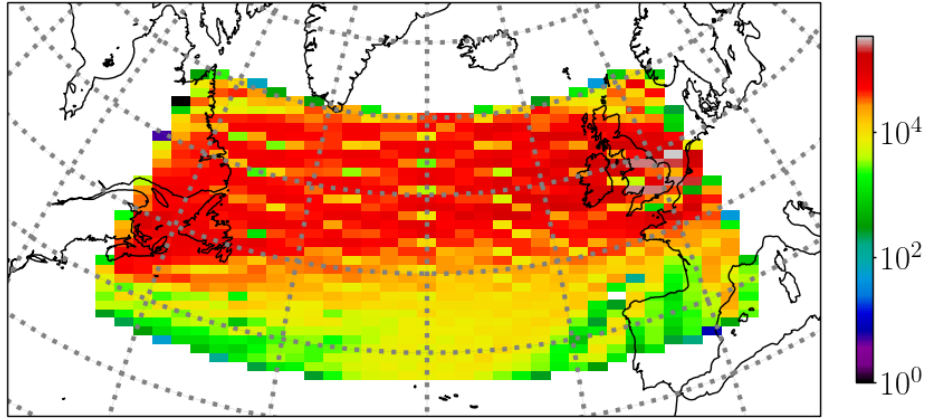

**Figure 1.** Geographic distribution Number of IAGOS observations shown as probability distribution function of data points measurements per gridbox ( $2^\circ$  in values of the decadal logarithm of % of data. The best coverage occurs over the North Atlantic flight corridor: longitudinal and  $0.57^\circ$  in latitudinal direction) during January 1st, 2000 to December 31st, 2009.

horizontal resolution of about 80 km in the mid-latitudes. The vertical dimension is separated into 60 levels reaching from the surface up to a pressure level of 0.1 hPa.

For the comparison with the IAGOS measurements the 6-hourly ERA-Interim data were previously converted on a  $1^\circ$  horizontally grid and interpolated on pressure levels (Kunz et al., 2014). Then, the fields of temperature, pressure and specific humidity are projected on the aircraft's flight path by linear spatial and temporal interpolation. Finally, the data is available with a 4s resolution temporal resolution of 4s along the flight track (Berkes et al., 2017).

The relative humidity with respect to ice was calculated using the approximation by Murphy and Koop (2005). As mentioned already in the introduction, the ERA-Interim data set was obtained by using the IFS model including the so-called Tompkins scheme (Tompkins et al., 2007), which allows for the supersaturation with respect to ice in cloud-free regions. However, inside of cirrus clouds an occurring supersaturation is adjusted down to 100%. In the following we use ERA to label the ERA-Interim data.

### 2.3 Methodology

Aircraft based measurements of atmospheric state variables and chemical composition usually refer to the aircraft flight altitude or pressure level, respectively. In the present work the humidity data will be separated relative to the tropopause height in order to study the humidity in the tropopause region. We use the dynamical tropopause, which is defined by a sharp gradient in the potential vorticity (PV). The here used value to define the tropopause is  $PV = 2$  PVU (1 PVU =  $10^6 \text{ K m}^2 \text{ kg}^{-1} \text{ s}^{-1}$ , standard potential vorticity unit) (Holton, 2005). A former study (Neis, 2017) showed that the choice of the tropopause definition can have an important impact on the interpretation of the results. However, in this study we want to compare two data sets. Therefore, the definition of the tropopause plays only a minor role. The vertical data will be distributed into three main layers: upper

| Region                 | Shortname | $p_{ap} - p_{tph}$ [hPa] | <u>number of measurements</u> |
|------------------------|-----------|--------------------------|-------------------------------|
| Lowermost stratosphere | LS3       | -90                      | <u>3 203 483</u>              |
|                        | LS2       | -60                      | <u>4 237 245</u>              |
|                        | LS 1      | -30                      | <u>5 268 138</u>              |
| Tropopause layer       | TL        | 0                        | <u>5 643 057</u>              |
| Uppermost troposphere  | UT1       | +30                      | <u>4 649 883</u>              |
|                        | UT2       | +60                      | <u>2 647 935</u>              |
|                        | UT3       | +90                      | <u>909 120</u>                |

**Table 1.** The data set is distributed into three main layers: the upper troposphere, tropopause layer, and lowermost stratosphere. The outer layers are additionally subdivided into three sublayers. The distribution criterion is the pressure difference between aircraft pressure  $p_{ac}$  and the tropopause pressure  $p_{tph}$  with the range of  $\pm 15$ hPa. Additionally, for every flight layer the number of IAGOS measurements between 2000 and 2009 are presented.

troposphere (UT), tropopause layer (TP), and lower stratosphere (LS) in accordance to Thouret et al. (2006). Furthermore, UT and LS are each separated into three subclasses. The width of the sublayers consider the average difference between ozone and thermal tropopause of 780 m (30 hPa at this altitude) (Bethan et al., 1996). The resulting seven 30 hPa thick bins separate the aircraft pressure relative to the tropopause pressure and are summarized in Table 1.

- 5 Before the distribution of the data several filters are applied. First, the measured data must lie within the geographic region from  $40^\circ$  to  $60^\circ$  North and  $-65^\circ$  to  $5^\circ$  East. All data must be collected in a height above 350 hPa and within a temperature range between 233 K and 200 K corresponding to the threshold of homogeneous freezing (Heymsfield and Sabin, 1989) and calibration limit of the humidity sensor (Neis, 2017), respectively. Additionally, the relative humidity with respect to liquid water must be below 100% and several measurement quality flags must be fulfilled. The above mentioned criteria are applied
- 10 to both data sets and is the starting point of the comparison.

### 3 Results Comparison between IAGOS measurements and ERA-Interim

The aim of this study-section is to compare and quantify the difference of relative humidity with respect to ice ( $RH_i$ ) between the in-situ measurements provided by IAGOS and the reanalysis data of ERA-Interim.

#### 15 3.1 Temperature

~~Vertical distribution of temperature K for (left) IAGOS and (right) ERA from the year 2000 to 2010. The different heights levels are color-coded.~~

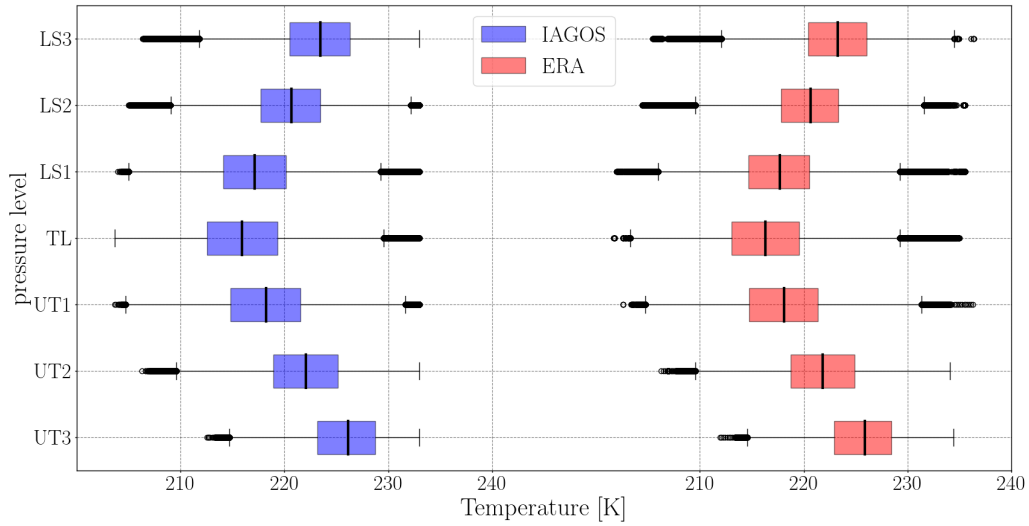

**Figure 2.** Vertical profile of temperature [K] for IAGOS (left) and ERA (right).

| Layer | Median temperature [K]                             |                                                    | Mean temperature [K]              |                                   | Standard deviation [K]        |                               |
|-------|----------------------------------------------------|----------------------------------------------------|-----------------------------------|-----------------------------------|-------------------------------|-------------------------------|
|       | IAGOS                                              | ERA                                                | IAGOS                             | ERA                               | IAGOS                         | ERA                           |
| LS3   | 223.5                                              | <del>223.4</del> <del>223.4</del> <del>223.3</del> | 223.3                             | <del>223.2</del>                  | 4.2                           | 4.1                           |
| LS2   | <del>220.8</del> <del>220.8</del> <del>220.7</del> | 220.7                                              | <del>4.3</del> <del>220.6</del>   | <del>220.5</del>                  | <del>4.2</del>                | 4.0                           |
| LS1   | <del>217.3</del> <del>217.2</del>                  | <del>217.9</del> <del>217.7</del>                  | <del>217.3</del> <del>217.1</del> | <del>217.8</del> <del>217.6</del> | 4.4                           | 4.2                           |
| TL    | <del>216.0</del> <del>215.9</del>                  | <del>216.4</del> <del>216.3</del>                  | <del>216.1</del> <del>216.0</del> | <del>216.5</del> <del>216.4</del> | <del>4.7</del> <del>4.8</del> | <del>4.5</del> <del>4.6</del> |
| UT1   | <del>218.3</del> <del>218.2</del>                  | 218.1                                              | <del>218.1</del> <del>218.2</del> | 218.0                             | 4.8                           | 4.7                           |
| UT2   | 222.0                                              | 221.8                                              | <del>221.9</del> <del>222.0</del> | <del>221.7</del> <del>221.8</del> | 4.4                           | 4.3                           |
| UT3   | 226.2                                              | <del>226.0</del> <del>225.9</del>                  | 225.9                             | <del>225.7</del> <del>225.6</del> | 3.8                           | <del>3.7</del> <del>3.8</del> |

**Table 2.** Median, mean and standard deviation of temperature [K] for IAGOS and ERA data. The comparison shows a very good agreement.

According to Equation 1 the relative humidity depends on temperature and available water vapour. ~~Figure ?? shows the temperature probability density function (PDF) in the seven vertical layers for IAGOS and ERA. With exception of layer UT3, the distributions show a quasi-Gaussian behaviour. As expected by definition, the tropopause layer shows the coldest mean temperatures with 216.1K and 216.5K for IAGOS and ERA, respectively. The warmest mean temperatures are visible for the lowest layer UT3 with about 225K in both cases. The origin of the "wave-like" structure of the distribution at the UT3-layer is not clear. One reason might be that in this layer, well inside the troposphere, a variety of dynamic and diabatic processes occur. Overall, the comparison between IAGOS and ERA shows a good agreement as far as the statistical values are concerned (see Table 2).~~

| Layer | Median VMR [ppmv]  |                    | Mean VMR [ppmv]    |                    | Standard deviation [ppmv] |                      |
|-------|--------------------|--------------------|--------------------|--------------------|---------------------------|----------------------|
|       | IAGOS              | ERA                | IAGOS              | ERA                | IAGOS                     | ERA                  |
| LS3   | <del>20-21</del>   | <del>19-18</del>   | 24                 | 22                 | <del>16.8-17.2</del>      | 14.7                 |
| LS2   | 25                 | <del>27-26</del>   | 29                 | <del>31-30</del>   | <del>19.6-19.9</del>      | <del>17.9-17.8</del> |
| LS1   | 36                 | 38                 | 42                 | 43                 | <del>26.6-27.0</del>      | <del>23.2-23.0</del> |
| TL    | 52                 | <del>52-51</del>   | 61                 | <del>31-58</del>   | <del>37.5-37.9</del>      | <del>31.1-30.9</del> |
| UT1   | 75                 | 71                 | 87                 | <del>81-80</del>   | <del>51.8-52.7</del>      | <del>44.5-44.4</del> |
| UT2   | <del>110-111</del> | 106                | <del>125-126</del> | 118                | <del>70.2-71.3</del>      | <del>62.8-62.4</del> |
| UT3   | <del>158-155</del> | <del>154-151</del> | <del>176-174</del> | <del>167-164</del> | <del>95.4-94.0</del>      | <del>83.6-81.5</del> |

**Table 3.** Median, mean and standard deviation of water vapour volume mixing ratio [ppmv] for IAGOS and ERA data. The comparison shows a very good agreement.

In a first step, a comparison between the temperature measurements and the reanalyses data for all seven height layers is conducted. Figure 2 shows the vertical profile of the temperature for IAGOS and ERA in the form of a Box-and-Whisker plot. The boxes are bounded by the 25% and 75% percentile, while the median is marked with a black vertical line. The whiskers are defined as  $1.5 \cdot IQ$  with  $IQ$  the interquartile range, being equal to the distance between the 25% and 75%. Outliers, values exceeding the whiskers, are marked as black circles. A very good agreement between the temperature in IAGOS and ERA-Interim is seen, highlighted by the symmetry of both profiles. Additionally, the boxes of the box-and-whisker plots are equal in size. As expected by definition, the tropopause layer shows the coldest mean temperatures with 216.1 K and 216.5 K for IAGOS and ERA, respectively. The warmest mean and median temperatures are visible for the lowest layer UT3 with about 226 K in both cases. Overall, the comparison between IAGOS and ERA shows a very good agreement as far as the statistical values are concerned (see Table 2). This is supported by the equally sized boxes in Fig. 2, pointing to a similar variability of the data set. As expected, for both data sets the minimal temperature is found in the tropopause layer.

### 3.2 Water vapour

Vertical distribution of water vapour volume mixing ratio ppmv for (left) IAGOS and (right) ERA.

The probability density function vertical structure of the water vapour volume mixing ratio is presented in Fig. 23. Here, a clear dependence of the distribution with height is visible. Note, due to the broadening of the distribution with decreasing height, the absolute probabilities are decreasing in this log-log illustration. The lowest mean and median values of the water vapour volume mixing ratio are observed, as expected, in the uppermost layer LS3. In contrast, the lowermost level UT3 shows the largest mean values of the water vapour mixing ratio. The comparison between IAGOS and ERA shows a good overall agreement (see Table 3). However, very low volume mixing ratios seem to be hard to achieve for the ERA model, which is visible for the two uppermost levels LS2 and LS3. It is also noteworthy that for the upper layers, beginning from

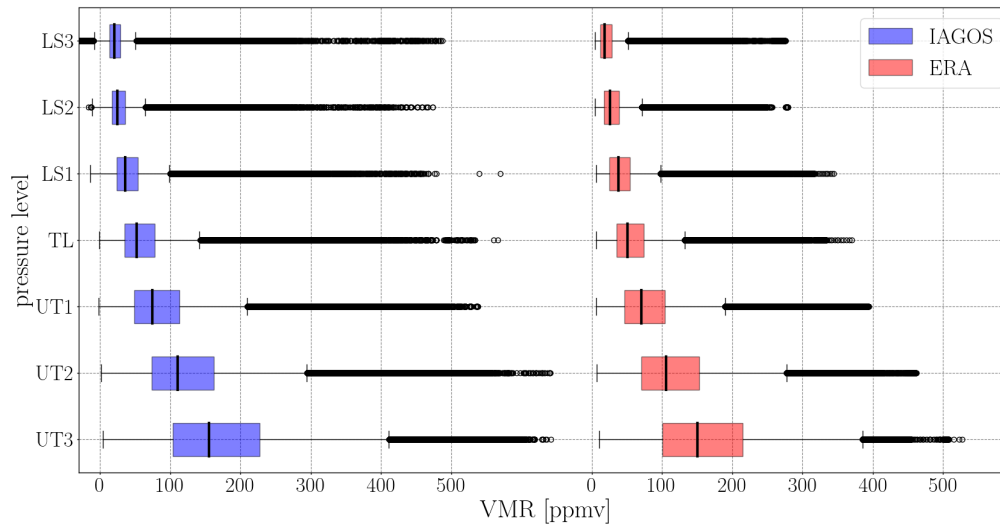

**Figure 3.** Vertical profile of H<sub>2</sub>O volume mixing ratio [ppmv] for IAGOS (left) and ERA (right).

the tropopause layer up to LS3, the left part of the distributions show always a much steeper behaviour in the ERA data set compared to IAGOS. Hence, ERA shows less variability of water vapour in the tropopause region and above.

~~Vertical profile of H<sub>2</sub>O volume mixing ratio ppmv for IAGOS (left) and ERA (right).~~

Figure 3 shows the vertical structure of the water vapour mixing ratio. For the upper layers in both data sets starting from the tropopause level (TL) up to LS3 the variability, i.e. the size of the boxes, is significantly lower compared to the tropospheric layers (UT1 to UT3). Overall it can be stated that the variability is increasing with decreasing height. ~~As mentioned before, the variability of the reanalysis data set is also smaller for the upper layers compared to the in-situ data. When focussing on absolute numbers it is also visible that IAGOS data set shows higher maximum values in the stratosphere compared to ERA. It is notable that the outliers in all layers of IAGOS reach clearly higher mixing ratios than ERA. This has significant effects on the relative humidity with respect to ice, as will be shown later.~~ In summary, the reanalysis data is in good agreement with the vertical distribution ~~and the seasonal cycle~~ of the IAGOS data ~~beside the smaller variability and extreme values of the in-situ data.~~ However, IAGOS shows a larger variability and stronger extreme values.

Dyroff et al. (2015) reported a moist bias comparing CARIBIC measurements with ECMWF analyses and forecasts. Since ERA-Interim is based on ECMWF analyses one would expect also a moist bias in the lower stratosphere. In contrast to the capacitive sensor used for IAGOS, CARIBIC uses a combination of a frost point hygrometer and a photo-acoustic hygrometer, which shows a better precision and uncertainty for very low water vapour volume mixing ratios. Therefore, the uncertainties in volume mixing ratios of H<sub>2</sub>O are large in the lower stratosphere and may explain the more wet stratospheric values compared to CARIBIC. For more information also see Petzold et al. (2019).

| Layer | Median RH <sub>i</sub> [%] |     | Mean RH <sub>i</sub> [%] |                         | Standard deviation RH <sub>i</sub> [%] |                         |
|-------|----------------------------|-----|--------------------------|-------------------------|----------------------------------------|-------------------------|
|       | IAGOS                      | ERA | IAGOS                    | ERA                     | IAGOS                                  | ERA                     |
| LS3   | 12                         | 11  | 15                       | 14                      | 12                                     | 10                      |
| LS2   | 20                         | 22  | <del>24</del> <u>25</u>  | 25                      | 17                                     | 15                      |
| LS1   | 47                         | 46  | <del>52</del> <u>53</u>  | <del>48</del> <u>49</u> | 29                                     | <del>22</del> <u>21</u> |
| TL    | 84                         | 77  | 82                       | 75                      | 29                                     | 22                      |
| UT1   | 93                         | 90  | <del>86</del> <u>89</u>  | <del>84</del> <u>83</u> | 27                                     | <del>20</del> <u>21</u> |
| UT2   | 89                         | 87  | 85                       | 81                      | 28                                     | 22                      |
| UT3   | 82                         | 81  | 79                       | 76                      | 30                                     | 23                      |

**Table 4.** Median, mean and standard deviation of RH<sub>i</sub> [%] for IAGOS and ERA. The comparison shows a good agreement.

### 3.3 Relative humidity with respect to ice

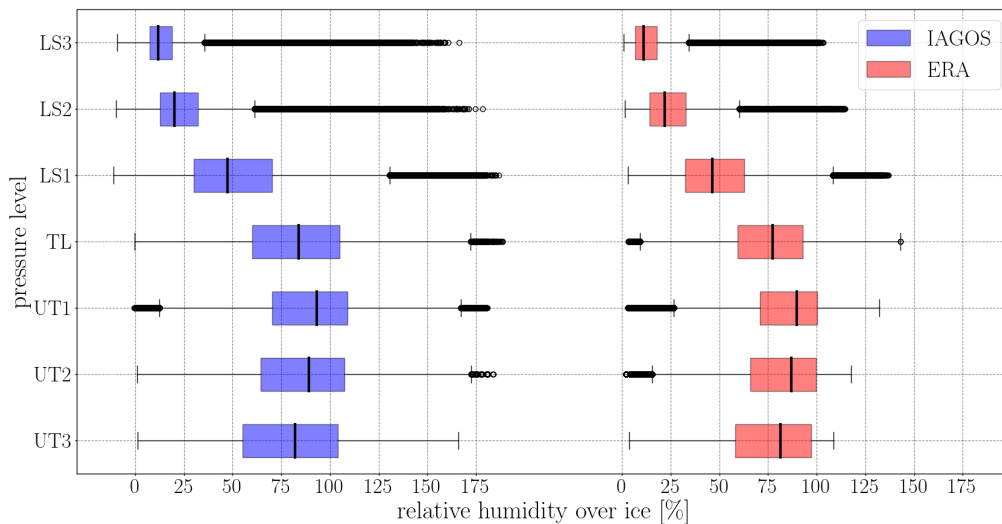

**Figure 4.** Vertical profile of relative humidity with respect to ice (RH<sub>i</sub>) [%] for IAGOS (left) and ERA (right).

Since cloud formation is governed by the relative humidity rather than the water vapour mixing ratio the relative humidity w.r.t. ice RH<sub>i</sub> is now investigated. As mentioned in the introduction, RH<sub>i</sub> depends on both temperature and available water vapour. Hence, relative humidity is a convolution of both variables. In Fig. 4 the vertical structure of RH<sub>i</sub> is depicted. The overall results show two different regimes. In the troposphere up to the tropopause layer the statistics cover the whole range

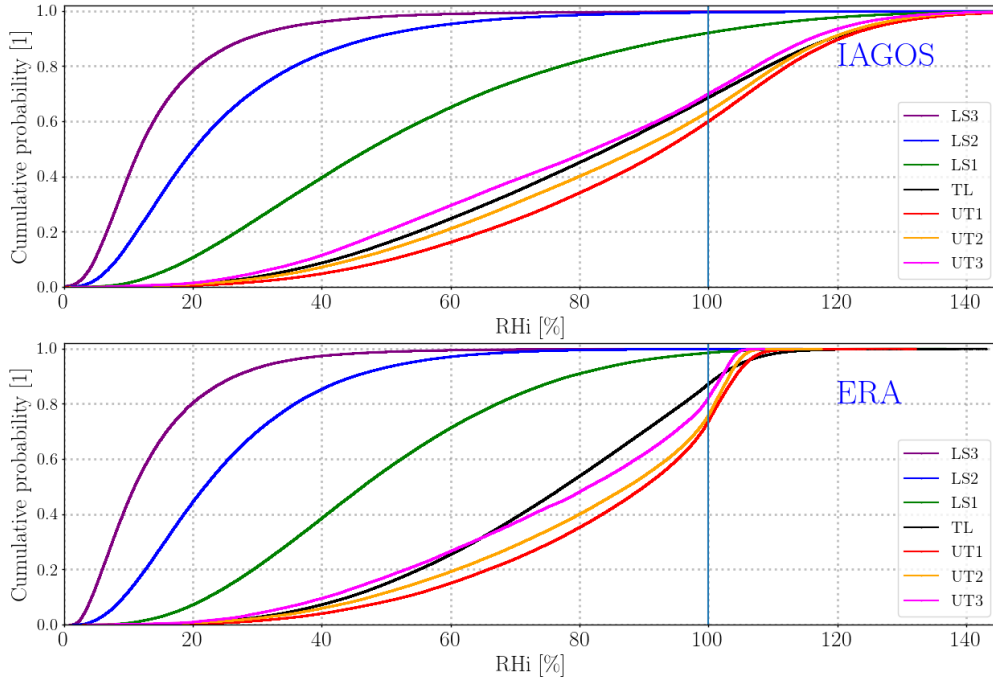

**Figure 5.** Cumulative distribution of  $RH_i$  for every height level in the IAGOS (top) and ERA (bottom) data set. The vertical blue line denotes saturation w.r.t. ice.

of possible saturation values. 50% of the data, indicated by the boxes, of each layer from UT3 to TL are situated between 50% and 100%  $RH_i$ . The highest median values are found in the layer UT1 for both data sets. In the tropopause layer still a significant amount of the data are exceeding values of  $RH_i > 100\%$ , both in the in-situ data as well as in the ERA data set. However, the whisker in Fig. 4 indicate that ERA has less data points with a higher supersaturation compared to IAGOS. In the stratospheric layers the median of the  $RH_i$  values is decreasing strongly. However, ice supersaturation is still possible, especially in the lowest stratospheric layer LS1 (Müller et al., 2015). The statistics of ISSRs in higher levels provided by the ERA data set shows clearly less occurrence of this feature. ~~This has important implications on the radiative impact of these layers on~~ Since ISSRs are an important factor for the lifetime of contrail cirrus, a good model representation of the abundance of ice supersaturation in this region is important for an adequate description of the Earth's radiative budget, if climate models underestimate the abundance of ISSRs.

It is obvious that ERA and IAGOS show a good agreement for situations below ice supersaturation. However, in this study we focus on the situation where ice supersaturation exists. For a more distinct look on the occurrence of ISSR we illustrate the statistic evaluation with cumulative probability distributions. Figure 5 shows the cumulative distributions for IAGOS and ERA.



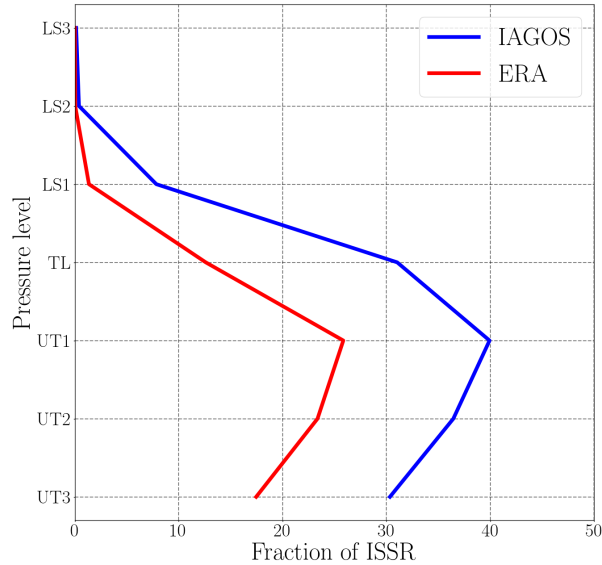

**Figure 6.** Vertical profile of the fraction of ice supersaturated regions for IAGOS (greenblue) and ERA (bluered)

Each layer is depicted with its own color. It is clearly visible that ERA and IAGOS behave differently for  $RH_i > 100\%$  especially for the tropospheric layers. The ERA distributions of the latter layers snap off as soon as they reach ice supersaturation. As mentioned before, the IFS-model allows the existence of ice supersaturation, but only in cloud free conditions. As soon as ice clouds are present in the models grid cell the supersaturation is adjusted to  $RH_i = 100\%$ . Unfortunately, the IAGOS data set of the investigated time frame cannot distinguish between cloudy and non-cloudy areas.<sup>1</sup> Nevertheless, also in ice clouds ice supersaturation is present (Krämer et al., 2016). Therefore, the behaviour of the cumulative distributions for ERA, especially in the layers from UT3 to TL, points to a missing process in the representation of ice supersaturation in the underlying IFS model.

Another way to compare the representation of the water vapour is the fraction of ISSRs. Figure 6 presents the vertical profile of the ISSR fraction. The ISSR fraction in this study is defined as the number of data points within a layer with  $RH_i > 100\%$  divided by the total number of data points in that layer above the defined North Atlantic region. It is clearly visible that the measurements by IAGOS show a higher fraction of ISSR. Only for the two uppermost layers the fraction of both data sets are of comparable magnitude. Here, the very dry conditions produce only in very few cases supersaturation. The largest difference between measurement and reanalysis data occur in the tropopause layer and the flanking UT1 layer, where a high percentage of ice clouds can be expected. IAGOS shows in the latter layer an ISSR fraction of up to 40%. Since

<sup>1</sup>Nowadays, the IAGOS setup includes an optical sensor for registration of clouds on the flight path.

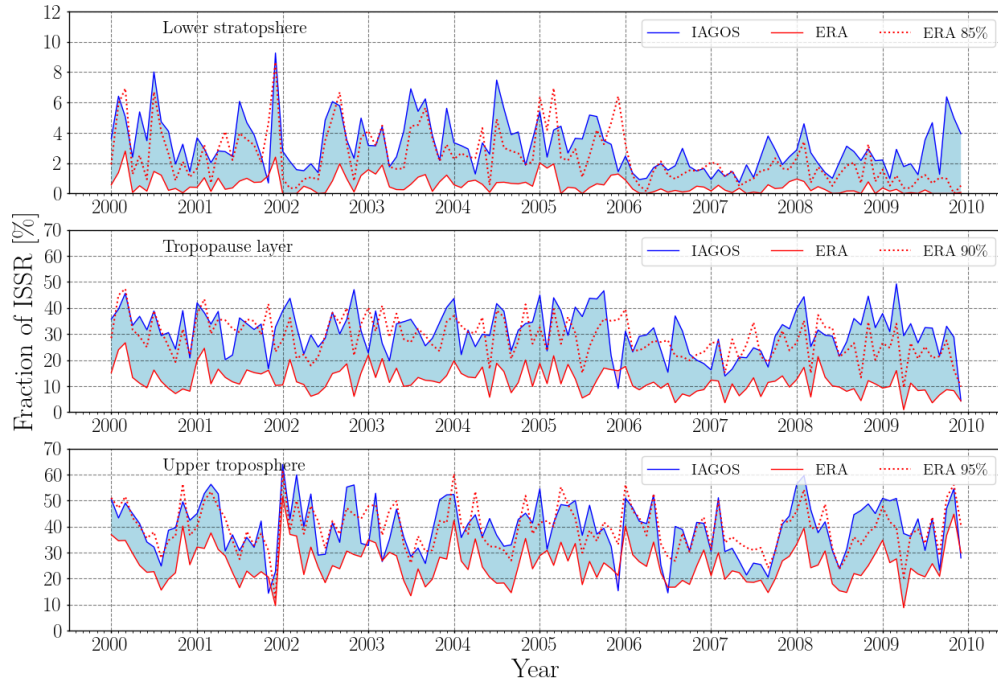

**Figure 7.** Time series of the monthly fraction of ice supersaturated regions for IAGOS (blue) and ERA (red) for the lower stratosphere (LS1 to LS3), the tropopause layer TL and the upper troposphere (UT1 to UT3). The dashed red line represents the ERA data set with the fraction of  $RH_i \geq 85\%$  for the lower stratosphere,  $RH_i \geq 90\%$  for the tropopause layer and  $RH_i \geq 95\%$  for the upper troposphere. Note the different scale for the lower stratosphere.

ISSR are a prerequisite for the formation of in-situ cirrus clouds, a misrepresentation of the feature can lead to great deviations in the local radiative budget and can build up to large errors in the local dynamics.

### 3.4 Horizontal scales of ice supersaturated regions

The

- 5 In contrast to the total fraction over the complete period from 2000 to 2009, Figure 7 shows a time series of the monthly ISSR fraction. For this comparison the three stratospheric (tropospheric) layers were combined to one layer defined as "lower stratosphere" ("upper troposphere"). Note, that the variation of the ISSR fraction is not only affected by meteorology but also due to different data coverage. For instance, in the end of 2001 only few data points are available, which explains the prominent spikes in the lower stratosphere and upper troposphere. Comparing the time series with Fig. 6, it is visible that ERA is
- 10 underestimating the fraction of ISSR compared to the measurements from IAGOS. However, Sensitivity studies were conducted

in order to see if ERA can reproduce the ISSR fraction of IAGOS using a lower threshold than  $RH_i = 100\%$ . For each layer a different  $RH_{i,ERA}$  threshold for the ERA data set leads to the best agreement. The best comparison between IAGOS and ERA in the lower stratosphere is found when *ice supersaturation* in ERA is defined as  $RH_{i,ERA} > 85\%$  (dashed red line in Fig. 7). For the tropopause layer the best agreement is found for  $RH_{i,ERA} > 90\%$  in ERA, while the upper troposphere shows highest match for  $RH_{i,ERA} > 95\%$  in ERA. This shows that the agreement between measurement and reanalysis is decreasing with increasing height. One reason might be the data assimilation of measurements into the reanalysis data set. The operational radiosondes using capacitive sensors with large response times at low temperatures (usually RS80 and RS92 with Humicap sensor by Vaisala) show large deviations for temperatures below  $-40^\circ\text{C}$  or very low absolute humidities (Spichtinger et al., 2003a).

#### 4 Horizontal scales of ice supersaturated regions in IAGOS and ERA-Interim

Although ISSRs are three-dimensional fields the measurements only provide one-dimensional pathlengths. Therefore, only the one-dimensional information can be used to investigate the size of ice supersaturated regions. To do so, the horizontal scale of ISSRs offers another possibility to compare the measurements of the IAGOS project with the reanalysis data from ERA. In IAGOS is used to characterize their size and number. We are also interested in the seasonal cycle and height dependence of ISSR pathlengths. Also, the distance between two neighbouring ISSRs are of interest. Additionally, these properties are compared to the reanalysis data and previous studies.

Former studies (Diao et al., 2014; Spichtinger and Leschner, 2016) showed that the horizontal pathlengths can reach from the very small scale in the order of hundred meters to up to 1000 km. Here, small scale variability will lead to very short ISSRs, while large scale features will produce large ISSR pathlengths. It is obvious that the smallest possible pathlength of the ERA data set is limited by the models spatial resolution. However, by calculating a moving average of the data close to the ERA resolution a comparison is possible. Additionally, we want to answer the question, which resolution is necessary in order to receive a helpful representation of the horizontal scales of ISSRs. A comprehensive representation of ISSRs in atmospheric models enables further investigations on the linkage between small-scale variability and large-scale features.

##### 4.0.1 Examples of ISSR representations during two different flights

Two flight paths showing  $RH_i$  for (blue) IAGOS, (red) ERA and (green) coarse IAGOS data (100 km). Left flight shows a good agreement between small and large scale features. Right flight shows a good representation of larger scales but without small scale features. Figure ?? presents two flights of the IAGOS data set. Figure 8 presents an exemplary flight from Atlanta (USA) to Frankfurt (Germany) on March 7th, 2009. Blue shows the high resolution data available from the IAGOS data base. Red shows marks the ERA data obtained from the given flight track and green shows a 100 km running mean of IAGOS data to mimic a coarse resolution comparable with the ERA spatial resolution. On the left side the black line shows the pressure level of the airplane. Shaded areas are blue for ice supersaturation in the IAGOS data set and red for ERA. In the upper part of Fig. 8 a satellite image from March 7th, 2009 can be seen. Note, that the flight landed at 7:52 UTC, while the satellite image is taken at 12 UTC, therefore a shift between measurements and image has to be kept in mind. A low pressure system, located

between the British Isles and Iceland is dominating the weather over the North Atlantic. The warm conveyor belt with its cloud band is clearly visible reaching from Ireland to the south-west. Between a flown distance of 5000 to 6000km an increase in the relative humidity with respect to ice is shown, both in IAGOS and ERA ~~show a good agreement~~. This is in agreement with other studies, where cirrus clouds and ice supersaturation are found in the ascending air masses of the warm conveyor belt (Spichtinger and Leschner, 2016). Behind the cold front a region of post frontal showers is visible. This is the region of the dry intrusion (Browning, 1997), where stratospheric dry air can be expected at cruising altitude of the airplane, which is visible with very low RH<sub>i</sub> values between a flown distance of 4000 and 5000 km.

The overall agreement between measurement and reanalysis is quite good, when focusing on the patterns of large scale variability. It is obvious that ERA, due to the coarse model resolution, is not able to reproduce the very small fluctuations as seen in in the IAGOS data. While the ~~magnitude of the ice supersaturation cannot be found in ERA, the reanalysis data shows also small scale features of IAGOS~~. For the other example ERA fails to display the smaller structures within the first half of the flight. However, the large scale feature is described in a useful way by ERA. In both examples the artificially coarse ~~resolution of the~~ first ISSR after start is reproduced by ERA at the right location, the ISSR at a flown distance of about 6000 km is misplaced compared to IAGOS. It can be also seen that the pathlength of the first ISSR is significantly larger in ERA. Note, that for this study only ISSRs within the North Atlantic region of this specific flight are taken into account.

In the following we will focus on the length of ISSRs. Therefore, we start with a statistical comparison of the pathlengths between IAGOS and ERA. Here, the influence of the spatial resolution on the statistics of ISSR pathlengths is investigated. After that, we use the unique IAGOS data set ~~is keeping the small scale information and lacks only the maximum supersaturation to~~ study in more detail the dependence of ISSR pathlengths on the season and atmospheric layer, i. e. the differences between the lower stratosphere, tropopause and upper troposphere.

#### 4.0.1 Histograms of ISSR

#### 4.1 Histograms of ISSR

~~Although ISSRs are three-dimensional fields the measurements only provide one-dimensional pathlengths.~~ It is obvious that the smallest possible pathlength of the ERA data set is limited by the models spatial resolution. However, by calculating a moving average of the data close to the ERA resolution a comparison is possible. Additionally, we want to answer the question, which resolution is necessary in order to receive a helpful representation of the horizontal scales of ISSRs. A comprehensive representation of ISSRs in atmospheric models enables further investigations on the linkage between small-scale variability and large-scale features.

For a reasonable comparison of ISSR pathlengths between IAGOS and ERA we only evaluate ISSRs on a constant flight level. This means that an ISSR path is omitted, if the pressure level of the plane is changed by more than 50 Pa. Figure 9 shows the histograms for the pathlengths of IAGOS, ERA and ~~different~~ running means of 2, 5, 10, 25, 50 and 100 km of the IAGOS data. On the right side, a cumulative distribution is shown. As it is expected from the different underlying resolutions of both data sets, IAGOS (black lines in Fig. 9) shows much more small pathlengths compared to ERA (red lines). On the other

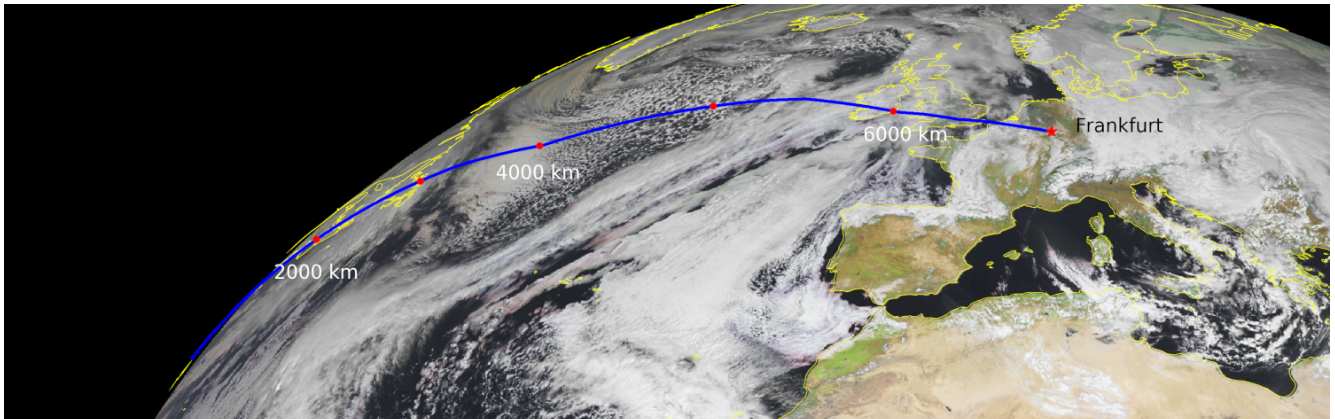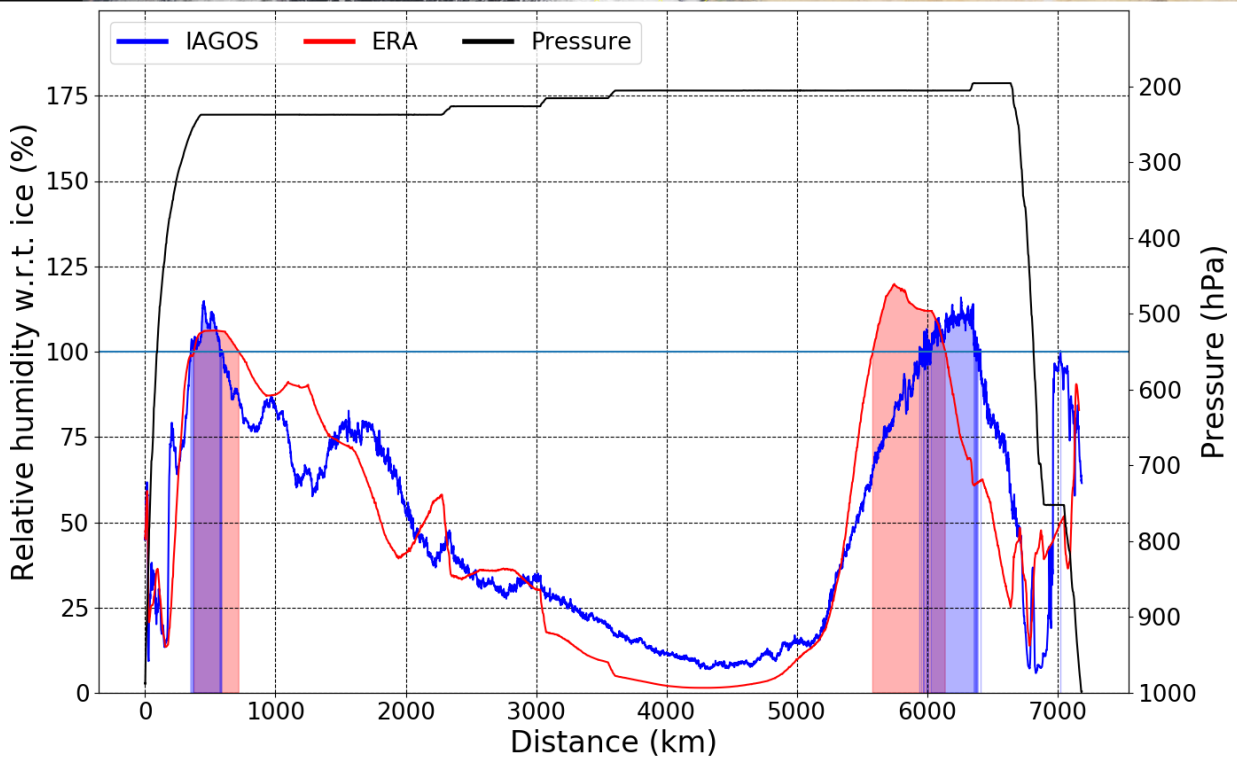

**Figure 8.** Example of typical flight from Atlanta (USA) to Frankfurt (Germany) on March 7th, 2009. The upper part shows the synoptic situation over the North Atlantic on that day including the flight path. For better orientation red dots are placed every 1000 km. In the lower part  $RH_i$  is shown over the distance of the flight for IAGOS (blue) and ERA (red). Shaded areas denote ice supersaturation. The pressure level of the aircraft is shown in black. Satellite image: copyright 2009 EUMETSAT.

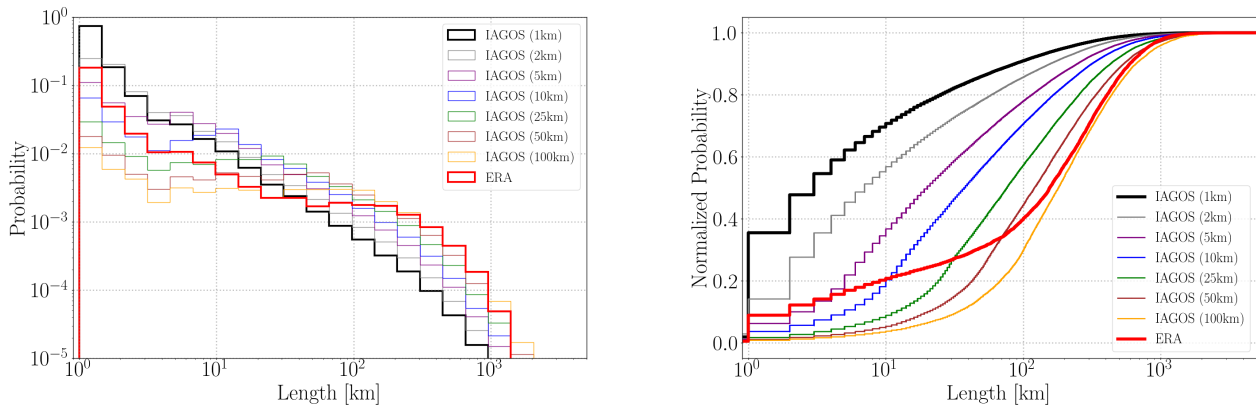

**Figure 9.** Probability with logarithmic binning (left) and cumulative probability (right)

side, ERA shows more very large pathlengths larger than 100km. This is especially impressive by looking on the cumulative distribution. Here, the different character of both data sets is most prominent. Comparing the median values given in Table 5 of the original IAGOS data and ERA reveal the big difference. While 50% of the ISSR pathlengths in IAGOS are smaller than ~~4km~~3km, the same threshold for the ERA data set is located at ~~164km~~156km. It has to be noted that due to the lower spatial resolution of the ERA data set only ~~9751~~6283 ISSRs are found compared to ~~107259~~81295 for IAGOS.

Previous studies also investigated pathlengths of ISSRs. Diao et al. (2014), hereafter D14, investigated ISSR from very high resolution measurements ( $1 \text{ Hz} \approx 230 \text{ m}$ ) using data from several flight campaigns. They report a mean ISSR pathlength of 3.5km, while the median values is about 0.7km with a total number of 1542 ISSRs. These value are about one order of magnitude lower compared to our investigations. However, this data includes measurements from 87N to 67S and therefore includes tropical conditions.

Spichtinger and Leschner (2016), hereafter SL16, used MOZAIC data from 1995 to 1999 with a original resolution of about 14km and artificially decreased the resolution to 100km. They report a mean pathlength of 122km and a median value of 55km for the original data, which are close to our results of IAGOS with a running mean of 10km. The coarse resolution of SL16 has a mean pathlength of 247km and a median value of 149km. These values are between our results for the running means of 50km and 100km of the IAGOS data. Additionally, the SL16 coarse data are in very good agreement with the mean and median of the ERA-Interim data.

The interesting comparison of the mean and median values with D14 and SL16 showed, that the results differ due to the underlying resolution of the measurement data. For every scale, a different conclusion can be drawn. Therefore, the question arises, which theoretical resolution is necessary resolution is feasible to describe the ice supersaturation in a sufficient realistic

|                 | IAGOS                          | ERA-Interim                   | IAGOS <sub>2km</sub>          | IAGOS <sub>5km</sub>          | IAGOS <sub>10km</sub>         | IAGOS <sub>25km</sub>         | IAGOS <sub>50km</sub>         | I |
|-----------------|--------------------------------|-------------------------------|-------------------------------|-------------------------------|-------------------------------|-------------------------------|-------------------------------|---|
| Median [km]     | <del>4</del> <u>3</u>          | <del>164</del> <u>156</u>     | 7                             | 20                            | <del>36</del> <u>37</u>       | <del>74</del> <u>76</u>       | <del>117</del> <u>121</u>     |   |
| Mean [km]       | <del>38.4</del> <u>38.4</u>    | <del>243.8</del> <u>243.8</u> | <del>58.3</del> <u>58.3</u>   | <del>89.3</del> <u>89.3</u>   | <del>118.3</del> <u>118.3</u> | <del>170.1</del> <u>170.1</u> | <del>223.0</del> <u>223.0</u> |   |
| Number of ISSRs | <del>107259</del> <u>81295</u> | <del>97516</del> <u>283</u>   | <del>76643</del> <u>79589</u> | <del>49986</del> <u>52932</u> | <del>37811</del> <u>39983</u> | <del>26165</del> <u>27453</u> | <del>19623</del> <u>20491</u> |   |

**Table 5.** Median and mean values and number of ISSR pathlengths for IAGOS, ERA-Interim and several running means of the original IAGOS data set.

way ~~.Therefore, the IAGOS data is converted not only to a resolution of 100 km but also to further resolutions by using running means of 2, 5, 10, 25 and 50 km for a certain scale.~~ Already with a resolution of 1 km the cumulative distribution exhibits a different character. ~~Only 35% of 2 km~~ the number of ISSR are found compared to the 1 km resolution and the median values ~~increases to 36 km~~ small ISSRs is decreasing strongly. The median value increases to 7 km, compared to the original resolution.

- 5 Decreasing the spatial resolution further leads to a decrease in the number of found ISSRs and an increase of the mean and median ISSR pathlength. At a resolution of 10 km the cumulative distribution exhibits a different character compared to the original data. When reaching a running mean of 100 km, which is around the spatial resolution of the ERA data set, the number of found ISSRs and median pathlength are similar to in the same order of magnitude as the reanalysis data. When comparing the results of the running means 100 km running mean of IAGOS with the ERA data set it is also noteworthy
- 10 that the behaviour ~~of the ERA data set changes for pathlengths of~~ for ERA is clearly different for pathlengths smaller than 100 km and lower. ERA shows a significantly higher probability for very small ISSRs (< 10 km) than the running mean with 100 km. However, the increase in probability to pathlengths of up to 100 km is flatter in ERA. Again, as a reminder, this is the scale of the spatial resolution of ERA.

It is clear that the ISSR with pathlengths smaller than 100 km are not represented in the ERA model in the same way as the

15 running mean of IAGOS shows it. This discrepancy on the first look may be small. However, as mentioned before, small ISSRs also can have a profound effect as formation region of cirrus clouds. The impact of these smaller ~~ISSRS~~ ISSRs on the larger scale by changing the dynamics around the tropopause are not clear yet.

#### 4.2 Seasonal cycle and height dependence of ISSR extensions

The previous results discussed the overall statistics of ISSR in the North Atlantic region. Fortunately, the unique IAGOS data set allows for a more sophisticated investigation of ISSR properties such as seasonal cycle or height dependence. Therefore, the seasonal cycle for the lower stratosphere, tropopause and upper troposphere is presented in Fig. 10. For the sake of clarity, we combine the three upper level to "lower stratosphere" and the three lower layers to "upper troposphere". Starting with spring (MAM), the cumulative distribution shows that in the lower stratosphere and the tropopause region a higher fraction of short ISSRs are present than in the upper troposphere. Up to 75% of the ISSRs in the lower stratosphere and the tropopause region

25 are smaller than 10 km. The upper troposphere shows the highest fraction of pathlengths between 10 km and 100 km. In the

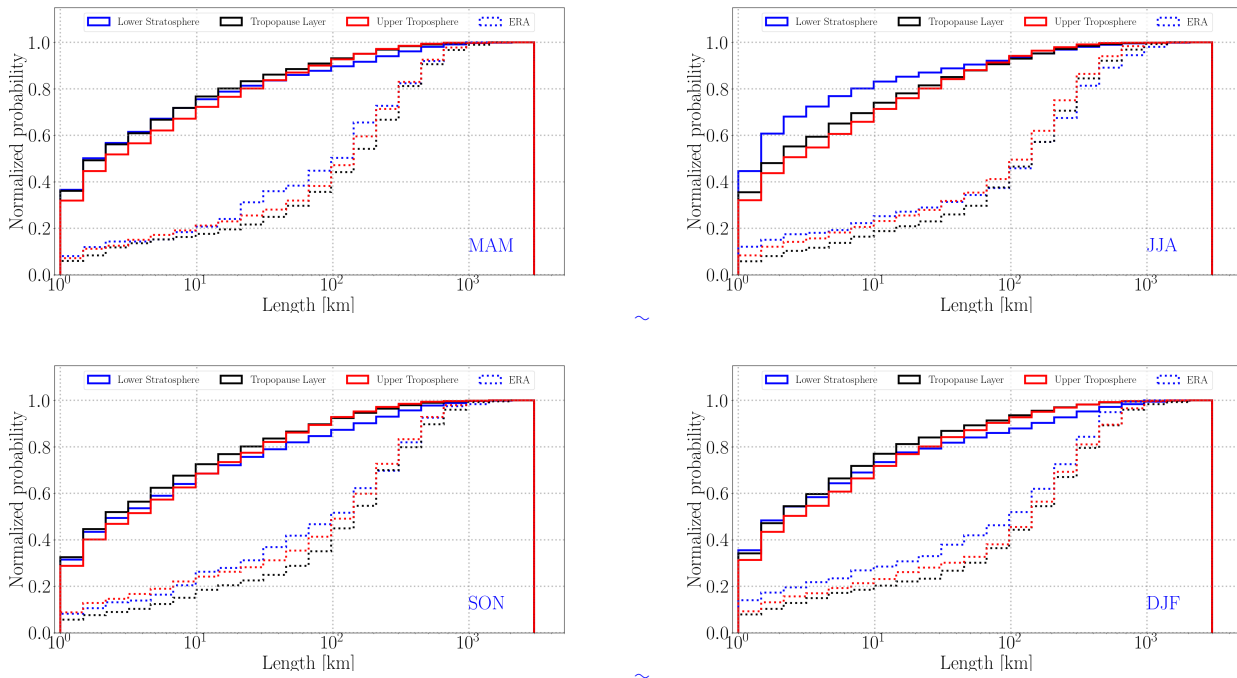

**Figure 10.** Seasonal cycle of ISSRs for lower stratosphere (blue), tropopause (black) and upper troposphere (red). Dashed lines show results for ERA. Top row presents spring and summer months, bottom row fall and winter months, respectively.

lower stratosphere, pathlengths larger than 100km are more common on a percentage basis compared to the tropopause and upper troposphere layers.

A clearly different result is visible during the summer months (JJA) in the lower stratosphere. 60% of the ISSRs are smaller than 2km and over 80% smaller than 10km. The special conditions for the stratosphere in the summer are also visible in the statistical values shown in Table 6. While the mean pathlength in the stratosphere for spring is around 55km, this value decreases to 35.8km in summer, before an increase to approximately 70km in fall and winter is observed.. It has to be noted that the number of ISSRs in the stratosphere during summer is over two times higher compared to the other seasons.

It is not clear, what kind of process is responsible for the large amount of small ISSRs during summer in the lower stratosphere. In principle, relative humidity w.r.t. ice can be altered by a change of temperature, pressure or specific humidity. Processes behind these changes can be especially adiabatic expansion or mixing of different air masses. SL16 investigated the origin of small scale ISSRs and concluded that most of the variation of RH<sub>i</sub> is due to adiabatic processes, i. e. cooling by expansion. This means that the transport of air masses from different altitudes create small scale variations of RH<sub>i</sub> in the region from the upper troposphere to the lower stratosphere. However, a deeper investigation of this question requires three-dimensional data and trajectory analysis, which are not in the scope of the present study but should be conducted in the future.



|               | Upper Troposphere |                |                  | Tropopause   |                |                  | Lower Stratosphere |                |                  |
|---------------|-------------------|----------------|------------------|--------------|----------------|------------------|--------------------|----------------|------------------|
| <u>Season</u> | <u>N</u>          | <u>mean(L)</u> | <u>median(L)</u> | <u>N</u>     | <u>mean(L)</u> | <u>median(L)</u> | <u>N</u>           | <u>mean(L)</u> | <u>median(L)</u> |
| <u>MAM</u>    | <u>12523</u>      | <u>36.3</u>    | <u>3.0</u>       | <u>10317</u> | <u>35.7</u>    | <u>3.0</u>       | <u>3995</u>        | <u>55.5</u>    | <u>2.0</u>       |
| <u>JJA</u>    | <u>19672</u>      | <u>34.1</u>    | <u>3.0</u>       | <u>13531</u> | <u>39.4</u>    | <u>3.0</u>       | <u>10924</u>       | <u>35.8</u>    | <u>2.0</u>       |
| <u>SON</u>    | <u>19517</u>      | <u>40.2</u>    | <u>4.0</u>       | <u>9602</u>  | <u>41.0</u>    | <u>3.0</u>       | <u>3630</u>        | <u>69.5</u>    | <u>4.0</u>       |
| <u>DJF</u>    | <u>13228</u>      | <u>36.4</u>    | <u>3.0</u>       | <u>8268</u>  | <u>34.5</u>    | <u>2.0</u>       | <u>3598</u>        | <u>67.9</u>    | <u>2.0</u>       |

**Table 6.** Number N, Mean and median of ISSR pathlengths L [km] for the upper troposphere, tropopause and lower stratosphere for the seasons MAM, JJA, SON and DJF.

The results for fall (SON) and winter (DJF) are very similar. The tropopause region shows the highest percentage of ISSRs with a pathlength smaller than 10km. Pathlengths between 10km and 100km show the highest fraction in the upper troposphere while the highest percentage of ISSR with sizes larger than 100km can be found in the lower stratosphere.

In general, the mean pathlength of an ISSR is significantly larger in the stratosphere compared to the upper troposphere and tropopause layer, except for the summer season, which is also shown in Fig. 11. Comparing the mean pathlengths for every season in the IAGOS data makes clear that the strongest seasonal cycle is present in the lower stratosphere with the lowest mean pathlength in summer and the highest values in fall and winter. The lower two layers also show a seasonal cycle, however with a smaller amplitude and shorter absolute mean values. While the upper troposphere also shows the shortest mean pathlength in the summer, the minimum in the tropopause is found during fall. Note, due to the large number of very small pathlengths in all seasons and all levels and the logarithmic binning of the results, the median values show only a small interseasonal fluctuation. Figure 11 also shows the seasonal cycle of the mean and median pathlength for the ERA data set. As expected, due to the large resolution of the data set also the mean and median values are significantly larger compared to IAGOS. More importantly, the seasonal cycle of ERA is shifted, especially for the tropopause and lower stratosphere. The maximum mean pathlength in the tropopause can be found in summer for IAGOS, where in the ERA data the minimum pathlength is found. The same holds true for the lower stratosphere, where the minimum for IAGOS is also found in summer, where ERA exhibits the maximum. Additionally, the height dependence in ERA is vice versa. For example, in spring the lower stratosphere shows the lowest percentage of ISSR in IAGOS, while ERA shows the highest.

SL16 also investigated the seasonal cycle of ISSRs. All ISSR of the extratropics (latitude  $\geq 30^\circ$ ) were separated into "troposphere", "stratosphere" and "in between" using the ozone mixing ratio. This chemical definition of the tropopause is close to the thermal definition. However, in our study we use the dynamical definition of the tropopause. This has to be kept in mind for the interpretation of the comparison. As mentioned above the data used in SL16 showed a coarser resolution of about 1min (which converts to about 14km depending on the true air speed of the plane) in contrast to the much higher 4s (about 1km) resolution in this study. They focused on the large-scale aspects of ISSRs and therefore the original data was analyzed with a coarse resolution (realized with a running mean of the original data) of about 100km. The coarser resolution makes

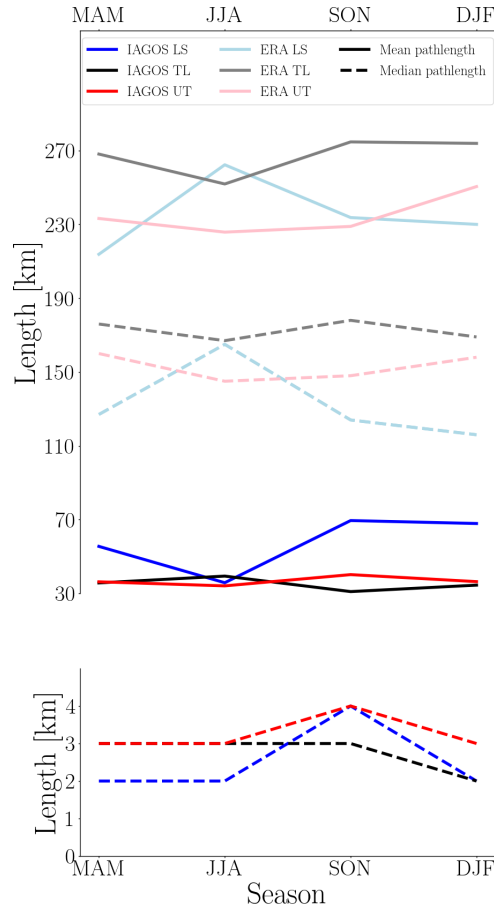

**Figure 11.** Seasonal cycle of mean and median pathlengths of ISSR for different atmospheric layers. Solid blue line shows the lower stratosphere (LS), solid black line the tropopause layer (TL), and solid red line upper troposphere (UT) for the IAGOS data set. Light colors denote the results for the ERA data set. Dashed lines denote the median pathlength, respectively. Note the break in the vertical axis.

a quantitative comparison difficult, since already 60 – 80% of the ISSRs in our study are smaller than 10 km, i.e. below the spatial resolution of the original data in SL16. The maximum of the mean pathlength in SL16 for the stratosphere is found in winter, while the minimum is found in fall. This is in contrast to the finding in the present study, where on the one hand in winter also the maximum pathlengths are found, but the minimum is found in summer. Additionally, during fall about the same mean pathlength can be found as in winter. The comparison of the seasonal cycle for the tropopause layer between SL16 and the present study reveals also a shift. The maximum mean pathlength in SL16 is found in fall, where our study detect the maximum in summer. The seasonal cycle in the tropospheric layer in SL16 and the present study is in good agreement.

It seems that the difference in the seasonal cycle between SL16 and our study can be, to a large fraction, attributed to the spatial resolution of the data. Figure 11 shows also the seasonal cycle for ERA, where the agreement with SL16 is better. Also, as mentioned in the discussion of Table 5, the agreement between ERA, the running mean of 50 km and 100 km as well as the results of SL16 is very good. Therefore, it is important to have the awareness that the spatial resolution can strongly influence the results of ISSR pathlengths.

### 4.3 Seasonal cycle and height dependence of distances between ISSRs

Finally, we present the seasonal cycle of the distance between two neighbouring ISSRs. Figure 12 shows the cumulative distributions of the distance between ISSRs for IAGOS and ERA, while in Table 7 the statistical overview is given. Here, a clear seasonal cycle is visible in all three layer, in contrast to the pathlengths of ISSR. For all layer, the maximum of the mean distance is found in fall, with the largest value of 79.1 km in the lower stratosphere and the smallest distance in the upper troposphere with 55 km. The shortest mean distances are found in winter for all layers with values from 35.3 km in the upper troposphere to 40.3 km in the lower stratosphere.

A shorter mean or median pathlength implies, that ISSRs are closer to each other (Diao et al., 2014). Therefore, in winter the conditions favour ISSRs with smaller distances. This also suggest that in the upper troposphere and the tropopause region, where the interseasonal mean pathlength of ISSR does not change strongly, the structure of ISSR is more heterogeneous than in other seasons. For the lower stratosphere one has to keep in mind, that the mean pathlength in winter is, together with fall, significantly larger than in spring or summer. Therefore, not only the distance between ISSR is shortest, but also the pathlength is largest.

In D14, the authors presented a mean distance between ISSRs about 47 km, while the median distance is approximately 1 km. This values are in good agreement with our findings. However, as mentioned before, D14 used global data without the distinction between geographical region or height. SL16 also investigated the distance between ISSRs. The mean and median values are significantly larger than in the present study, which is, again, due to the different spatial resolution. Also, as for the ISSR pathlength, the seasonal cycle is shifted compared to the higher resolution in our work. Comparing the height dependence of IAGOS with ERA reveals a reversed and even enhanced dependence as it is shown by the distance of the vertical layers with the ERA data set.

| Season | Upper Troposphere |         |           | Tropopause |         |           | Lower Stratosphere |         |           |
|--------|-------------------|---------|-----------|------------|---------|-----------|--------------------|---------|-----------|
|        | N                 | mean(D) | median(D) | N          | mean(D) | median(D) | N                  | mean(D) | median(D) |
| MAM    | 11784             | 43.8    | 3.0       | 9429       | 50.8    | 2.0       | 3198               | 49.3    | 3.0       |
| JJA    | 18367             | 54.7    | 3.0       | 12540      | 60.9    | 3.0       | 9828               | 52.6    | 3.0       |
| SON    | 18362             | 55.0    | 3.0       | 8754       | 67.8    | 3.0       | 2789               | 79.1    | 3.0       |
| DJF    | 12578             | 35.3    | 2.0       | 7589       | 39.1    | 2.0       | 2822               | 40.3    | 2.0       |

**Table 7.** Mean and median of the distance  $D$  [km] between ISSRs for the upper troposphere, tropopause and lower stratosphere for the seasons MAM, JJA, SON and DJF.

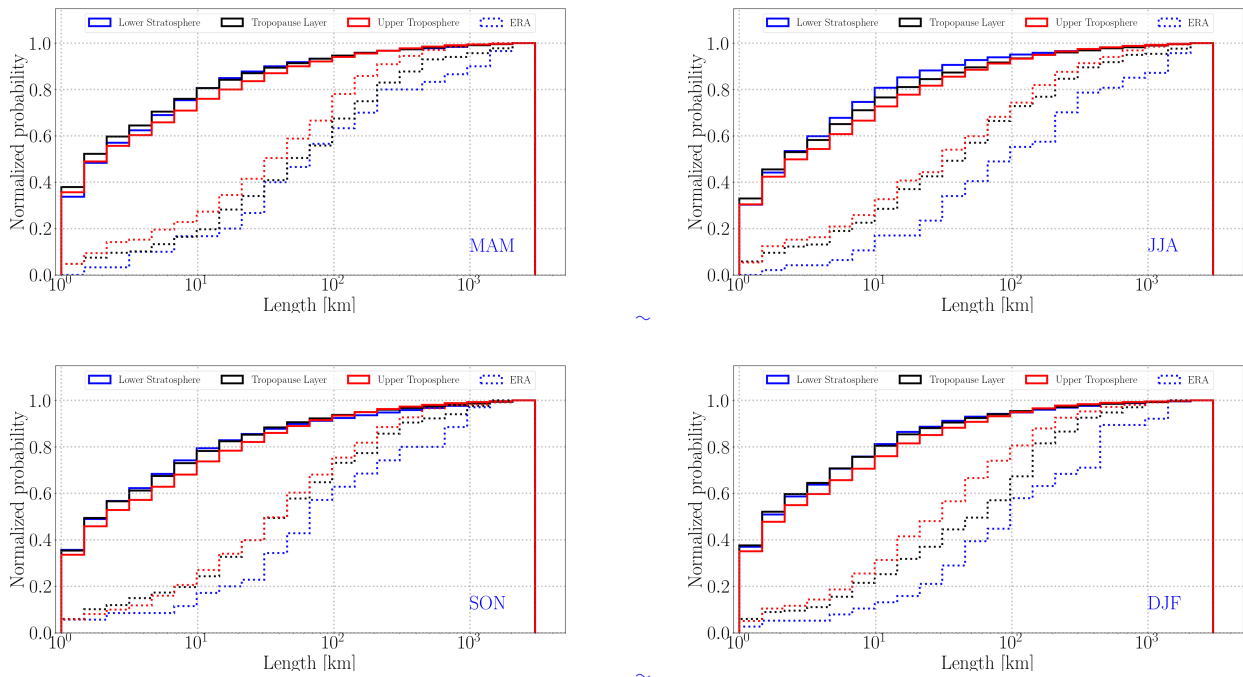

**Figure 12.** Seasonal cycle of the distance between ISSRs for lower stratosphere (blue), tropopause (black) and upper troposphere (red). Dashed lines show results for ERA. Top row presents spring and summer months, bottom row fall and winter months, respectively.

## 5 Conclusions

This study compares the in-situ measurements of temperature and water vapour and subsequent relative humidity with respect to ice in the UTLS region obtained by IAGOS with the reanalysis data set ERA-Interim from the year 2000 to ~~2010~~2009 over the North Atlantic. ~~ISSRs~~Ice supersaturated regions (ISSRs) are of special interest in this investigation due to their abundance and importance on the local radiation budget when transformed to a cirrus cloud. Additionally, the characteristics of the horizontal scale of ISSRs is investigated, including the seasonal cycle and height dependence. Both data sets are separated according to their relative height compared to the dynamical tropopause (2PVU).

The comparison of the temperature shows a good agreement between measurement and reanalysis data. The structure and variability of the vertical temperature distribution is very similar, shown by a very good accordance in median and mean values as well as in the standard deviation.

The water vapour was analyzed using the water vapour mixing ratio. Both data sets show the clear decrease of water vapour with increasing height. In contrast to the measurements ERA shows clearly less variability, indicated by smaller standard deviations in all levels.

The convolution of water vapour and temperature leads to the relative humidity with respect to ice, which governs the cloud formation. Both data sets reproduce two different regimes. In the UT layers including the tropopause layer, the statistics cover the whole range of possible saturation values, where most of the data lie between 50% and 100% RH<sub>i</sub>. However, ERA deviates from the RH<sub>i</sub> measurements concerning values of larger than RH<sub>i</sub> = 100% by showing less data points and weaker supersaturations, impressively depicted by the comparison of cumulative distributions. This is an important finding, because it points to a misrepresentation in ERA of ice supersaturation in the UT and tropopause region, which is the formation region of in-situ cirrus.

Moving up to the stratospheric layers the RH<sub>i</sub> values, as expected, ~~the RH<sub>i</sub> values~~ are much lower in both data sets. Again, ERA shows less and weaker supersaturations through all levels. Since the LS is very dry, supersaturation occurs rarely and therefore the difference between both data sets is smaller regarding the cumulative distribution. Nevertheless, ERA shows clearly less extreme events.

The strong differences between IAGOS and ERA with respect to ISSRs is also shown by the fraction of ISSR. In the UT and the tropopause region the measurements show a significantly larger fraction of ISSR in the measurements compared to ERA.

The comparison of ~~pathlengths~~pathlengths of ISSRs shows clearly the different resolutions of the two data sets. It is obvious that the high-resolution measurements show more small ISSRs than ERA. Only beginning with ~~pathlengths~~pathlengths in the order of 100 km the distribution start to have a similar course. This length scale coincides with the horizontal resolution of the underlying ERA model.

Decreasing the resolution of the IAGOS data by running means shows only a good agreement of model and measurement beginning with a running mean of 100 km, which is, as stated, in the order of the model resolution. However, even in the latter case, the structure of the distribution of ISSR smaller than 100 km is clearly different between IAGOS and ERA. Therefore, a

simple increase of the model resolution seems not sufficient – Additionally, the physical processes must be refined carefully for a realistic description of the ice supersaturation in the UTLS region.

~~Although the new version of reanalysis data from the ECMWF, ERA5, is already available, we conducted this study using ERA-Interim. Many studies in this decade regarding the UTLS region are based on ERA-Interim model output (e.g. Zhan and Wang (2012); Riese et al. (2012); Uma et al. (2014); Madonna et al. (2014); Reutter et al. (2015)). Also, ERA-Interim is still used in many ongoing investigations. Therefore, a comparison between measurements and ERA-Interim is still valuable. Nevertheless, the influence of the spatial resolution on the length and number of ISSRs has been~~ The investigation of the horizontal scales of ISSRs provides several results. First, the high resolution data from IAGOS showed a very high percentage of small-scale ISSRs, which is highlighted by median values between 2 and 4 km for all heights during all seasons. Up to 80% of the ISSRs are smaller than 10 km. The seasonal cycle of the ISSR pathlengths is small for the upper troposphere and tropopause region, but shows a distinct change for the lower stratosphere during the course of the year. Here, during summer the mean pathlength of an ISSR is lowest with 35.8 km compared to the maximum during fall with 69.5 km. The comparison with previous studies using different spatial resolutions as well as ERA showed, that the characteristics of the horizontal scale strongly depends on the data structure. Not only the statistical values like mean and median values differ strongly, but also the seasonal cycle is shifted when using different resolutions. Additionally, the sign of the height dependence is changed when comparing IAGOS with ERA.

The results for the distance between ISSRs shows the same behaviour than the pathlengths. Here, also the spatial resolution of the data has an influence on the resulting seasonal cycle and height dependence. This shows the limitations of one-dimensional data along flight tracks.

The influence of the spatial resolution on the results on ISSR pathlengths was shown in this study ~~impressively~~. The size, magnitude and seasonal cycle of ISSRs are closely related to the underlying spatial resolution of the data. Hence, future studies should focus on three-dimensional data from models for further investigations. Therefore, the next step is to compare the IAGOS measurements with the higher resolution data of ERA5 ( $\Delta x = 31$  km). It is likely, that the agreement between measurement and reanalysis data is therefore increased. However, a thorough review is advisable. Subsequently, the new reanalysis data will be used for three-dimensional investigations of physical processes regarding ice supersaturation in the UTLS region.

*Author contributions.* PR and PN performed the analyses and both wrote the text; PN and SR were in charge of the instrument setup, calibration, and processing of the measurements; BS combined reanalysis data with measurements; BS and SR checked the manuscript.

*Competing interests.* The authors declare that they have no conflict of interest.

*Acknowledgements.* [The authors thank two anonymous reviewer for their very helpful comments and suggestions, which improved the quality of this manuscript.](#) Philipp Reutter and Patrick Neis want to thank Peter Spichtinger, Andreas Petzold, [Herman G. J. Smit](#) and Peter Hoor for many helpful discussions.

## References

- Berkes, F., Neis, P., Schultz, M. G., Bundke, U., Rohs, S., Smit, H. G. J., Wahner, A., Konopka, P., Boulanger, D., Nédélec, P., Thouret, V., and Petzold, A.: In situ temperature measurements in the upper troposphere and lowermost stratosphere from 2 decades of IAGOS long-term routine observation, *Atmospheric Chemistry and Physics*, 17, 12 495–12 508, <https://doi.org/10.5194/acp-17-12495-2017>, <https://www.atmos-chem-phys.net/17/12495/2017/>, 2017.
- Bethan, S., Vaughan, G., and Reid, S. J.: A comparison of ozone and thermal tropopause heights and the impact of tropopause definition on quantifying the ozone content of the troposphere, *Quarterly Journal of the Royal Meteorological Society*, 122, 929–944, <https://doi.org/10.1002/qj.49712253207>, <https://rmets.onlinelibrary.wiley.com/doi/abs/10.1002/qj.49712253207>, 1996.
- Brenninkmeijer, C. A. M., Crutzen, P., Boumard, F., Dauer, T., Dix, B., Ebinghaus, R., Filippi, D., Fischer, H., Franke, H., Frieß, U., Heintzenberg, J., Helleis, F., Hermann, M., Kock, H. H., Koepfel, C., Lelieveld, J., Leuenberger, M., Martinsson, B. G., Miemczyk, S., Moret, H. P., Nguyen, H. N., Nyfeler, P., Oram, D., O’Sullivan, D., Penkett, S., Platt, U., Pucek, M., Ramonet, M., Randa, B., Reichelt, M., Rhee, T. S., Rohwer, J., Rosenfeld, K., Scharffe, D., Schlager, H., Schumann, U., Slemr, F., Sprung, D., Stock, P., Thaler, R., Valentino, F., van Velthoven, P., Waibel, A., Wandel, A., Waschitschek, K., Wiedensohler, A., Xueref-Remy, I., Zahn, A., Zech, U., and Ziereis, H.: Civil Aircraft for the regular investigation of the atmosphere based on an instrumented container: The new CARIBIC system, *Atmos. Chem. Phys.*, p. 24, 2007.
- Browning, K. A.: The dry intrusion perspective of extra-tropical cyclone development, *Meteorological Applications*, 4, 317–324, <https://doi.org/10.1017/S1350482797000613>, <https://rmets.onlinelibrary.wiley.com/doi/abs/10.1017/S1350482797000613>, 1997.
- Bundke, U., Berg, M., Houben, N., Ibrahim, A., Fiebig, M., Tettich, F., Klaus, C., Franke, H., and Petzold, A.: The IAGOS-CORE aerosol package: instrument design, operation and performance for continuous measurement aboard in-service aircraft, *Tellus B: Chemical and Physical Meteorology*, 67, 28 339, <https://doi.org/10.3402/tellusb.v67.28339>, <https://www.tandfonline.com/doi/full/10.3402/tellusb.v67.28339>, 2015.
- Dee, D. P., Uppala, S. M., Simmons, A. J., Berrisford, P., Poli, P., Kobayashi, S., Andrae, U., Balmaseda, M. A., Balsamo, G., Bauer, P., Bechtold, P., Beljaars, A. C. M., Berg, L. v. d., Bidlot, J., Bormann, N., Delsol, C., Dragani, R., Fuentes, M., Geer, A. J., Haimberger, L., Healy, S. B., Hersbach, H., Hólm, E. V., Isaksen, I., Kållberg, P., Köhler, M., Matricardi, M., McNally, A. P., Monge-Sanz, B. M., Morcrette, J.-J., Park, B.-K., Peubey, C., Rosnay, P. d., Tavolato, C., Thépaut, J.-N., and Vitart, F.: The ERA-Interim reanalysis: configuration and performance of the data assimilation system, *Quarterly Journal of the Royal Meteorological Society*, 137, 553–597, <https://doi.org/10.1002/qj.828>, <https://rmets.onlinelibrary.wiley.com/doi/abs/10.1002/qj.828>, 2011.
- DeMott, P. J., Cziczo, D. J., Prenni, A. J., Murphy, D. M., Kreidenweis, S. M., Thomson, D. S., Borys, R., and Rogers, D. C.: Measurements of the concentration and composition of nuclei for cirrus formation, *Proceedings of the National Academy of Sciences*, 100, 14 655–14 660, <https://doi.org/10.1073/pnas.2532677100>, <http://www.pnas.org/cgi/doi/10.1073/pnas.2532677100>, 2003.
- Dessler, A. E. and Sherwood, S. C.: ATMOSPHERIC SCIENCE: A Matter of Humidity, *Science*, 323, 1020–1021, <https://doi.org/10.1126/science.1171264>, <http://www.sciencemag.org/cgi/doi/10.1126/science.1171264>, 2009.
- Diao, M., Zondlo, M. A., Heymsfield, A. J., Avallone, L. M., Paige, M. E., Beaton, S. P., Campos, T., and Rogers, D. C.: Cloud-scale ice-supersaturated regions spatially correlate with high water vapor heterogeneities, *Atmospheric Chemistry and Physics*, 14, 2639–2656, <https://doi.org/10.5194/acp-14-2639-2014>, <https://www.atmos-chem-phys.net/14/2639/2014/>, 2014.



- Dyhoff, C., Zahn, A., Christner, E., Forbes, R., Tompkins, A. M., and Velthoven, P. F. J. v.: Comparison of ECMWF analysis and forecast humidity data with CARIBIC upper troposphere and lower stratosphere observations, *Quarterly Journal of the Royal Meteorological Society*, 141, 833–844, <https://doi.org/10.1002/qj.2400>, <https://rmets.onlinelibrary.wiley.com/doi/abs/10.1002/qj.2400>, 2015.
- Filges, A., Gerbig, C., Chen, H., Franke, H., Klaus, C., and Jordan, A.: The IAGOS-core greenhouse gas package: a measurement system for continuous airborne observations of CO<sub>2</sub>, CH<sub>4</sub>, H<sub>2</sub>O and CO, *Tellus B: Chemical and Physical Meteorology*, 67, 27 989, <https://doi.org/10.3402/tellusb.v67.27989>, <https://www.tandfonline.com/doi/full/10.3402/tellusb.v67.27989>, 2015.
- Fusina, F., Spichtinger, P., and Lohmann, U.: Impact of ice supersaturated regions and thin cirrus on radiation in the midlatitudes, *Journal of Geophysical Research: Atmospheres*, 112, <https://doi.org/10.1029/2007JD008449>, <https://agupubs.onlinelibrary.wiley.com/doi/abs/10.1029/2007JD008449>, 2007.
- 10 Gettelman, A., Fetzer, E. J., Eldering, A., and Irion, F. W.: The Global Distribution of Supersaturation in the Upper Troposphere from the Atmospheric Infrared Sounder, *Journal of Climate*, 19, 6089–6103, <https://doi.org/10.1175/JCLI3955.1>, <http://journals.ametsoc.org/doi/abs/10.1175/JCLI3955.1>, 2006.
- Gierens, K. and Spichtinger, P.: On the size distribution of ice-supersaturated regions in the upper troposphere and lowermost stratosphere, *Annales Geophysicae*, 18, 6, 2000.
- 15 Gierens, K., Schumann, U., Helten, M., Smit, H., and Marenco, A.: A distribution law for relative humidity in the upper troposphere and lower stratosphere derived from three years of MOZAIC measurements, *Annales Geophysicae*, 17, 9, 1999.
- Held, I. M. and Soden, B. J.: Water Vapor Feedback and Global Warming, *Annual Review of Energy and the Environment*, 25, 441–475, <https://doi.org/10.1146/annurev.energy.25.1.441>, <https://doi.org/10.1146/annurev.energy.25.1.441>, 2000.
- Heymsfield, A. J. and Sabin, M., R.: Cirrus Crystal Nucleation by Homogeneous Freezing of Solution Droplets, *Journal of the Atmospheric Sciences*, 46, 2252–2264, [https://doi.org/10.1175/1520-0469\(1989\)046](https://doi.org/10.1175/1520-0469(1989)046), 1989.
- 20 Holton, J.: *An Introduction to Dynamic Meteorology*, 5 edn., <https://www.elsevier.com/books/an-introduction-to-dynamic-meteorology/holton/978-0-12-384866-6>, 2005.
- Joos, H., Spichtinger, P., Reutter, P., and Fusina, F.: Influence of heterogeneous freezing on the microphysical and radiative properties of orographic cirrus clouds, *Atmospheric Chemistry and Physics*, 14, 6835–6852, <https://doi.org/10.5194/acp-14-6835-2014>, <https://www.atmos-chem-phys.net/14/6835/2014/>, 2014.
- 25 Koop, T., Luo, B., Tsias, A., and Peter, T.: Water activity as the determinant for homogeneous ice nucleation in aqueous solutions, *Nature*, 406, 611–614, <https://doi.org/10.1038/35020537>, <http://www.nature.com/articles/35020537>, 2000.
- Krämer, M., Rolf, C., Luebke, A., Afchine, A., Spelten, N., Costa, A., Meyer, J., Zöger, M., Smith, J., Herman, R. L., Buchholz, B., Ebert, V., Baumgardner, D., Borrmann, S., Klingebiel, M., and Avallone, L.: A microphysics guide to cirrus clouds – Part 1: Cirrus types, *Atmospheric Chemistry and Physics*, 16, 3463–3483, <https://doi.org/10.5194/acp-16-3463-2016>, <https://www.atmos-chem-phys.net/16/3463/2016/>, 2016.
- 30 Kunz, A., Spelten, N., Konopka, P., Müller, R., Forbes, R. M., and Wernli, H.: Comparison of Fast In situ Stratospheric Hygrometer (FISH) measurements of water vapor in the upper troposphere and lower stratosphere (UTLS) with ECMWF (re)analysis data, *Atmospheric Chemistry and Physics*, 14, 10 803–10 822, <https://doi.org/10.5194/acp-14-10803-2014>, <https://www.atmos-chem-phys.net/14/10803/2014/>, 2014.
- 35 Madonna, E., Wernli, H., Joos, H., and Martius, O.: Warm Conveyor Belts in the ERA-Interim Dataset (1979–2010). Part I: Climatology and Potential Vorticity Evolution, *Journal of Climate*, 27, 3–26, <https://doi.org/10.1175/JCLI-D-12-00720.1>, <http://journals.ametsoc.org/doi/abs/10.1175/JCLI-D-12-00720.1>, 2014.

- Marengo, A., Thouret, V., Nédélec, P., Smit, H., Helten, M., Kley, D., Karcher, F., Simon, P., Law, K., Pyle, J., Poschmann, G., Wrede, R. V., Hume, C., and Cook, T.: Measurement of ozone and water vapor by Airbus in-service aircraft: The MOZAIK airborne program, an overview, *Journal of Geophysical Research: Atmospheres*, 103, 25 631–25 642, <https://doi.org/10.1029/98JD00977>, <https://agupubs.onlinelibrary.wiley.com/doi/abs/10.1029/98JD00977>, 1998.
- 5 Mohler, O., Field, P. R., Connolly, P., Benz, S., Saathoff, H., Schnaiter, M., Wagner, R., Cotton, R., Kramer, M., Mangold, A., and Heymseld, A. J.: Efficiency of the deposition mode ice nucleation on mineral dust particles, *Atmos. Chem. Phys.*, p. 15, 2006.
- Murphy, D. M. and Koop, T.: Review of the vapour pressures of ice and supercooled water for atmospheric applications, *Quarterly Journal of the Royal Meteorological Society*, 131, 1539–1565, <https://doi.org/10.1256/qj.04.94>, <https://rmets.onlinelibrary.wiley.com/doi/abs/10.1256/qj.04.94>, 2005.
- 10 Myhre, G., Samset, B. H., Schulz, M., Balkanski, Y., Bauer, S., Berntsen, T. K., Bian, H., Bellouin, N., Chin, M., Diehl, T., Easter, R. C., Feichter, J., Ghan, S. J., Hauglustaine, D., Iversen, T., Kinne, S., Kirkevåg, A., Lamarque, J.-F., Lin, G., Liu, X., Lund, M. T., Luo, G., Ma, X., van Noije, T., Penner, J. E., Rasch, P. J., Ruiz, A., Seland, , Skeie, R. B., Stier, P., Takemura, T., Tsigaridis, K., Wang, P., Wang, Z., Xu, L., Yu, H., Yu, F., Yoon, J.-H., Zhang, K., Zhang, H., and Zhou, C.: Radiative forcing of the direct aerosol effect from AeroCom Phase II simulations, *Atmospheric Chemistry and Physics*, 13, 1853–1877, <https://doi.org/10.5194/acp-13-1853-2013>,  
 15 <https://www.atmos-chem-phys.net/13/1853/2013/>, 2013.
- Müller, S., Hoor, P., Berkes, F., Bozem, H., Klingebiel, M., Reutter, P., Smit, H. G. J., Wendisch, M., Spichtinger, P., and Borrmann, S.: In situ detection of stratosphere-troposphere exchange of cirrus particles in the midlatitudes, *Geophysical Research Letters*, 42, 949–955, <https://doi.org/10.1002/2014GL062556>, <https://agupubs.onlinelibrary.wiley.com/doi/abs/10.1002/2014GL062556>, 2015.
- Neis, P. R.: Water vapour in the UTLS - Climatologies and Transport, Ph.D. thesis, Johannes Gutenberg University, Mainz, 2017.
- 20 Petzold, A., Thouret, V., Gerbig, C., Zahn, A., Brenninkmeijer, C. A. M., Gallagher, M., Hermann, M., Pontaud, M., Ziereis, H., Boulanger, D., Marshall, J., Nédélec, P., Smit, H. G. J., Friess, U., Flaud, J.-M., Wahner, A., Cammas, J.-P., Volz-Thomas, A., and IAGOS TEAM: Global-scale atmosphere monitoring by in-service aircraft – current achievements and future prospects of the European Research Infrastructure IAGOS, *Tellus B: Chemical and Physical Meteorology*, 67, 28 452, <https://doi.org/10.3402/tellusb.v67.28452>,  
<https://www.tandfonline.com/doi/full/10.3402/tellusb.v67.28452>, 2015.
- 25 Petzold, A., Neis, P., Rütimann, M., Rohs, S., Berkes, F., Smit, H. G. J., Krämer, M., Spelten, N., Spichtinger, P., Nedelec, P., and Wahner, A.: Ice-supersaturated air masses in the northern mid-latitudes from regular in-situ observations by passenger aircraft: vertical distribution, seasonality and tropospheric fingerprint, *Atmospheric Chemistry and Physics Discussions*, pp. 1–29, <https://doi.org/https://doi.org/10.5194/acp-2019-735>, <https://www.atmos-chem-phys-discuss.net/acp-2019-735/>, 2019.
- Reutter, P., Škerlak, B., Sprenger, M., and Wernli, H.: Stratosphere–troposphere exchange (STE) in the vicinity of North Atlantic cyclones, *Atmospheric Chemistry and Physics*, 15, 10939–10953, <https://doi.org/10.5194/acp-15-10939-2015>, <https://www.atmos-chem-phys.net/15/10939/2015/>, 2015.
- Riese, M., Ploeger, F., Rap, A., Vogel, B., Konopka, P., Dameris, M., and Forster, P.: Impact of uncertainties in atmospheric mixing on simulated UTLS composition and related radiative effects, *Journal of Geophysical Research: Atmospheres*, 117, <https://doi.org/10.1029/2012JD017751>, <https://agupubs.onlinelibrary.wiley.com/doi/abs/10.1029/2012JD017751>, 2012.
- 35 Rohs, S., Schiller, C., Riese, M., Engel, A., Schmidt, U., Wetter, T., Levin, I., Nakazawa, T., and Aoki, S.: Long-term changes of methane and hydrogen in the stratosphere in the period 1978–2003 and their impact on the abundance of stratospheric water vapor, *Journal of Geophysical Research: Atmospheres*, 111, <https://doi.org/10.1029/2005JD006877>, <https://agupubs.onlinelibrary.wiley.com/doi/abs/10.1029/2005JD006877>, 2006.

- Solomon, S., Rosenlof, K. H., Portmann, R. W., Daniel, J. S., Davis, S. M., Sanford, T. J., and Plattner, G.-K.: Contributions of Stratospheric Water Vapor to Decadal Changes in the Rate of Global Warming, *Science*, 327, 1219–1223, <https://doi.org/10.1126/science.1182488>, <http://www.sciencemag.org/cgi/doi/10.1126/science.1182488>, 2010.
- Spichtinger, P.: Shallow cirrus convection – a source for ice supersaturation, *Tellus A: Dynamic Meteorology and Oceanography*, 66, 19937, <https://doi.org/10.3402/tellusa.v66.19937>, <https://www.tandfonline.com/doi/full/10.3402/tellusa.v66.19937>, 2014.
- 5 Spichtinger, P. and Leschner, M.: Horizontal scales of ice-supersaturated regions, *Tellus B: Chemical and Physical Meteorology*, 68, 29020, <https://doi.org/10.3402/tellusb.v68.29020>, <https://www.tandfonline.com/doi/full/10.3402/tellusb.v68.29020>, 2016.
- Spichtinger, P., Gierens, K., Leiterer, U., and Dier, H.: Ice supersaturation in the tropopause region over Lindenberg, Germany, <https://www.ingentaconnect.com/content/schweiz/mz/2003/00000012/00000003/art00004#>, 2003a.
- 10 Spichtinger, P., Gierens, K., and Read, W.: The global distribution of ice-supersaturated regions as seen by the Microwave Limb Sounder, *Quarterly Journal of the Royal Meteorological Society*, 129, 3391–3410, <https://doi.org/10.1256/qj.02.141>, <https://rmets.onlinelibrary.wiley.com/doi/abs/10.1256/qj.02.141>, 2003b.
- Thompson, A. M.: The Oxidizing Capacity of the Earth’s Atmosphere: Probable Past and Future Changes, *Science*, 256, 1157–1165, <https://doi.org/10.1126/science.256.5060.1157>, <http://www.sciencemag.org/cgi/doi/10.1126/science.256.5060.1157>, 1992.
- 15 Thouret, V., Cammas, J.-P., Sauvage, B., Athier, G., Zbinden, R., Nedelec, P., Simon, P., and Karcher, F.: Tropopause referenced ozone climatology and inter-annual variability (1994–2003) from the MOZAIC programme, *Atmos. Chem. Phys.*, 6, 19, 2006.
- Tompkins, A. M., Gierens, K., and Rädcl, G.: Ice supersaturation in the ECMWF integrated forecast system, *Quarterly Journal of the Royal Meteorological Society*, 133, 53–63, <https://doi.org/10.1002/qj.14>, <https://rmets.onlinelibrary.wiley.com/doi/abs/10.1002/qj.14>, 2007.
- Uma, K. N., Das, S. K., and Das, S. S.: A climatological perspective of water vapor at the UTLS region over different global monsoon  
20 regions: observations inferred from the Aura-MLS and reanalysis data, *Climate Dynamics*, 43, 407–420, <https://doi.org/10.1007/s00382-014-2085-9>, <http://link.springer.com/10.1007/s00382-014-2085-9>, 2014.
- Zhan, R. and Wang, Y.: Contribution of tropical cyclones to stratosphere-troposphere exchange over the northwest Pacific: Estimation based on AIRS satellite retrievals and ERA-Interim data: CONTRIBUTION BY TCS TO STE OVER WNP, *Journal of Geophysical Research: Atmospheres*, 117, n/a–n/a, <https://doi.org/10.1029/2012JD017494>, <http://doi.wiley.com/10.1029/2012JD017494>, 2012.
